# Supplementary material for: Global, regional, and national epidemiology of childhood neuroblastoma (1990–2021): a statistical analysis of incidence, mortality, and DALYs
Source: PubMed Central journal article supplement (PMC11667623; doi:10.1016/j.eclinm.2024.102964), 2024-12-06
Supplement: mmc1.pdf [file mmc1.pdf]

**Figure S1.** Mortality from childhood neuroblastoma in 204 countries and territories. A, Number of deaths. B, Mortality rates. C, Estimated annual percentage change (EAPC) in Mortality.

**Figure S2.** Disability-adjusted life years (DALYs) for childhood neuroblastoma in 204 countries and territories. A, Number of DALYs cases. B, DALYs rates. C, Estimated annual percentage change (EAPC) in DALYs.

**Table S1.** Mortality of Neuroblastoma in Children Between 1990 and 2021 at the Global and Regional Level.

**Table S2.** Disability-adjusted life years (DALYs) of Neuroblastoma in Children Between 1990 and 2021 at the Global and Regional Level.

**Table S3.** Incidence of neuroblastoma in children, by countries and territories, 1990-2021.

**Table S4.** Mortality of neuroblastoma in children, by countries and territories, 1990-2021.

**Table S5.** Disability-adjusted life years (DALYs) of neuroblastoma in children, by countries and territories, 1990-2021.

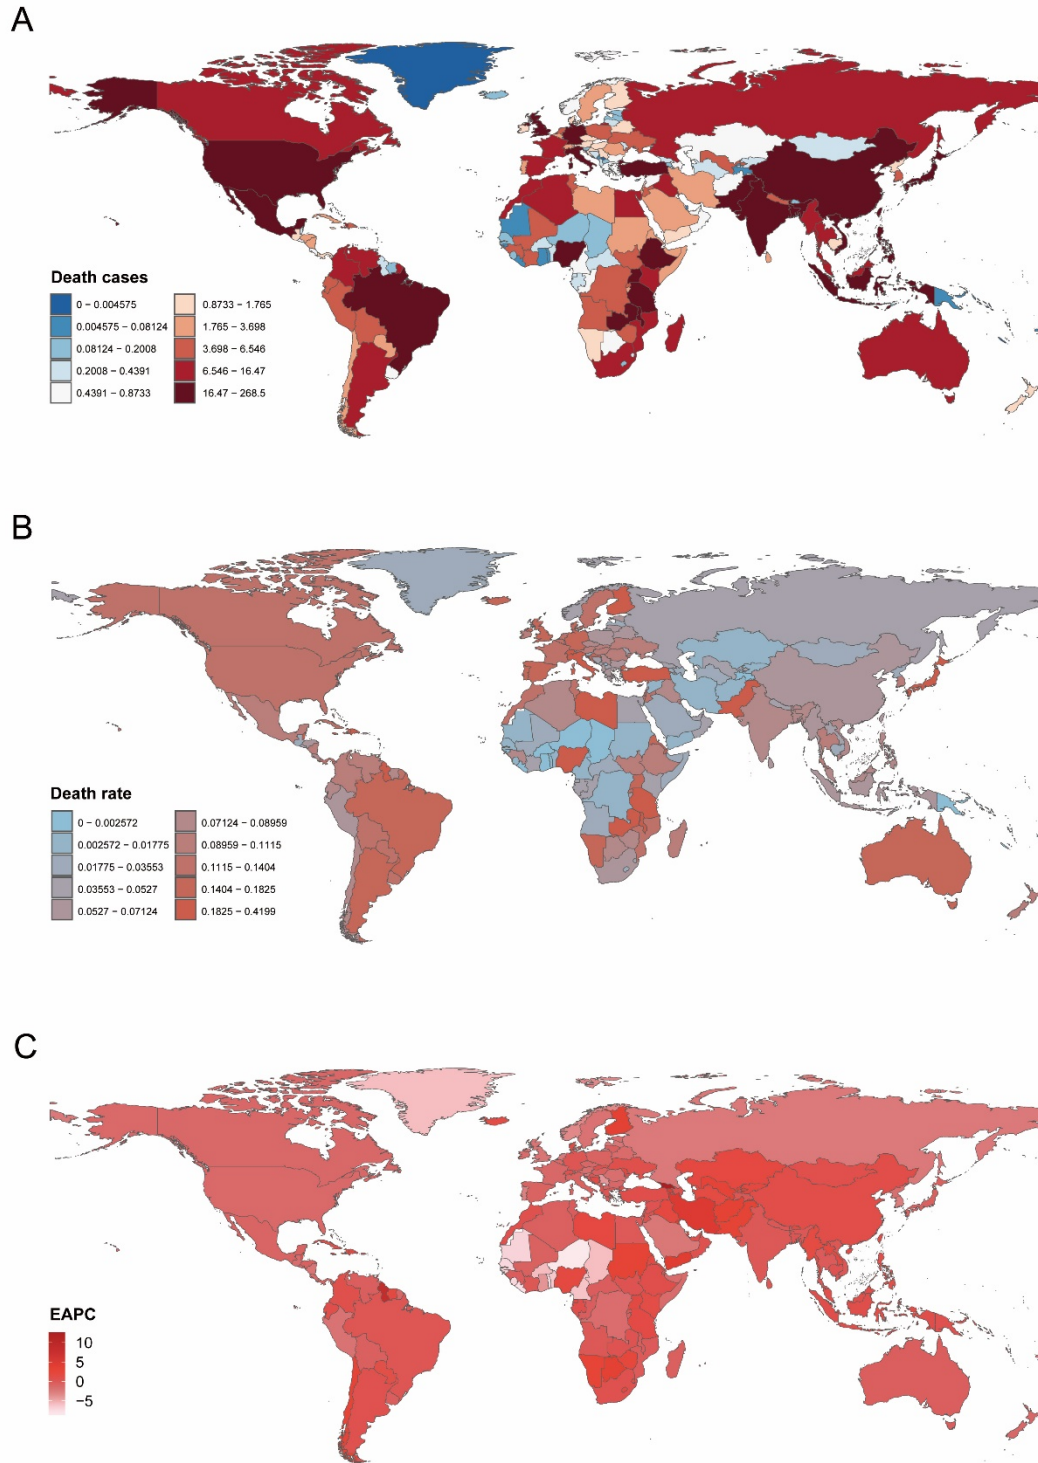

**Figure S1.** Mortality from childhood neuroblastoma in 204 countries and territories.

A, Number of deaths. B, Mortality rates. C, Estimated annual percentage change

(EAPC) in Mortality.

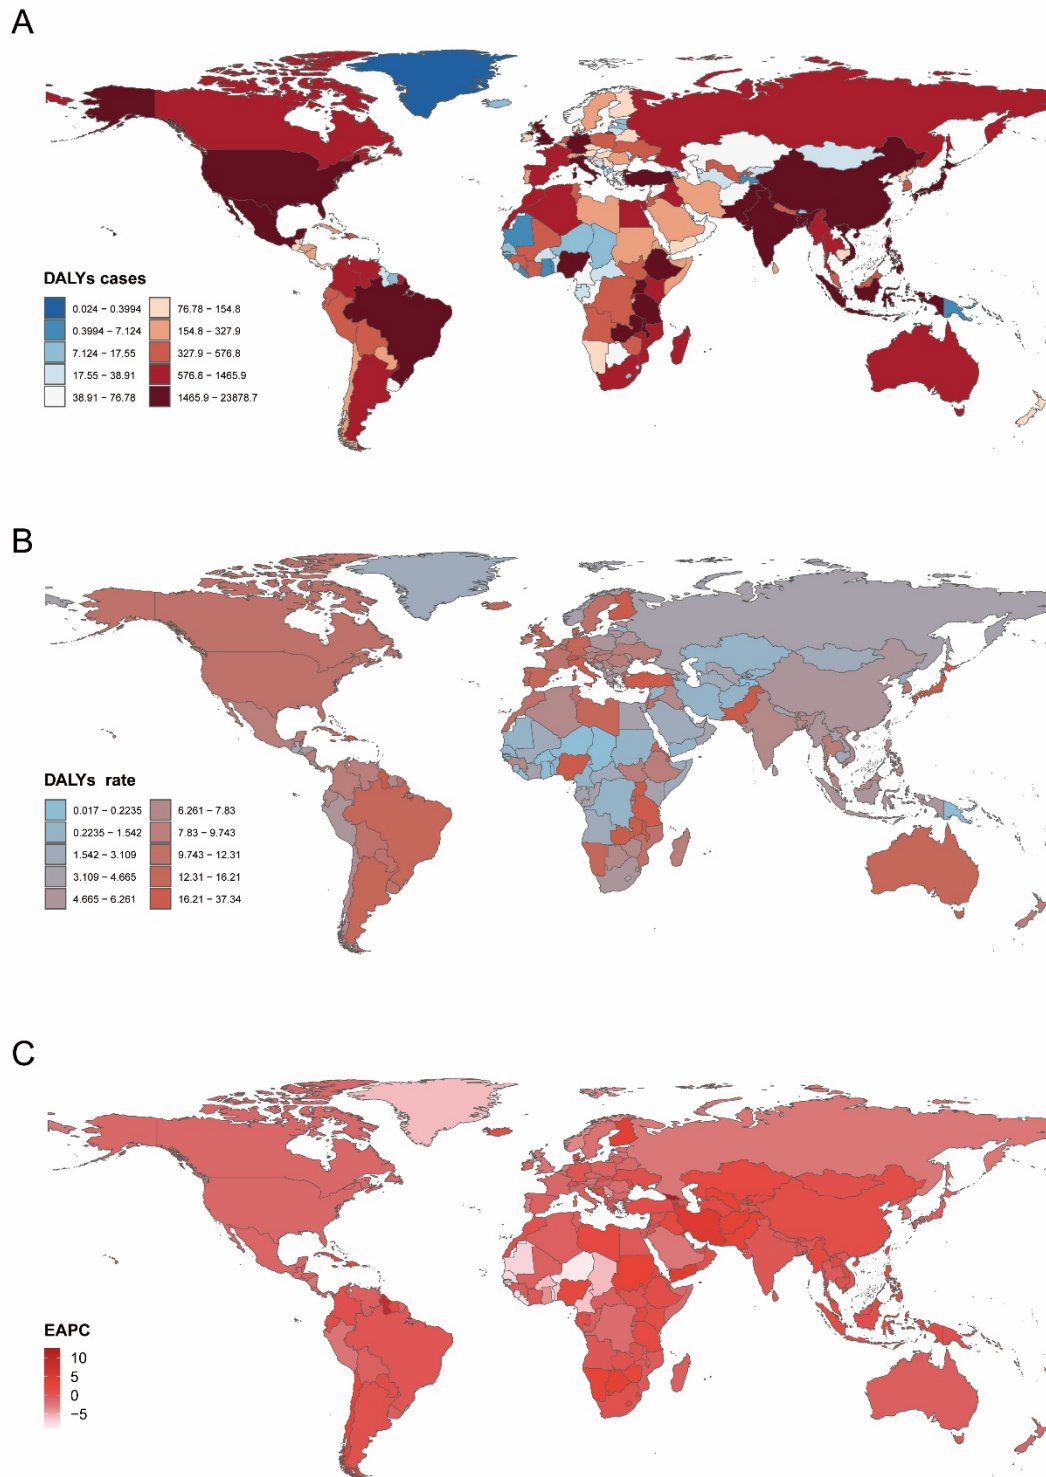

**Figure S2.** Disability-adjusted life years (DALYs) for childhood neuroblastoma in 204 countries and territories. A, Number of DALYs cases. B, DALYs rates. C, Estimated annual percentage change (EAPC) in DALYs.

**Table S1. Mortality of Neuroblastoma in Children Between 1990 and 2021 at the Global and Regional Level.**

| location             | Rate per 100 000(95%UI) |                  |                        |                  |                           |                          |                     |
|----------------------|-------------------------|------------------|------------------------|------------------|---------------------------|--------------------------|---------------------|
|                      | 1990                    |                  | 2021                   |                  | 1990-2021                 |                          |                     |
|                      | Number of deaths        | Mortality rate   | Number of deaths       | Mortality rate   | Cases change <sup>b</sup> | Rate change <sup>b</sup> | EAPC <sup>a</sup>   |
| Global               | 1643(1373.57, 1956.38)  | 0.09(0.08, 0.11) | 1977(1445.04, 2528.54) | 0.10(0.07, 0.13) | 20.35(-12.44 to 63.30)    | 4.04(-24.31, 41.16)      | 0.49(0.41, 0.56)    |
| <b>SDI</b>           |                         |                  |                        |                  |                           |                          |                     |
| Low SDI              | 180 (120.54, 281.48)    | 0.08(0.05, 0.12) | 433 (234.36, 696.99)   | 0.09(0.05, 0.15) | 140.39(32.14 to 294.44)   | 19.57(-34.27, 96.19)     | 0.39(0.13, 0.64)    |
| Low - middle SDI     | 371 (280.76, 493.61)    | 0.08(0.06, 0.10) | 613 (433.07, 819.67)   | 0.11(0.07, 0.14) | 65.26(11.71 to 151.07)    | 34.56(-9.04, 104.43)     | 1.22(1.09, 1.34)    |
| Middle SDI           | 450(365.93, 527.86)     | 0.08(0.06, 0.09) | 487 (363.58, 614.45)   | 0.09(0.06, 0.11) | 8.29(-17.96 to 45.39)     | 10.27(-16.47, 48.04)     | 1.14(0.97, 1.32)    |
| High - middle SDI    | 289 (245.25, 337.63)    | 0.11(0.09, 0.12) | 219 (170.19, 264.65)   | 0.09(0.07, 0.11) | -24.25(-42.35 to -0.12)   | -10.23(-31.68, 18.37)    | 0.57(0.37, 0.76)    |
| High SDI             | 351(332.26, 368.33)     | 0.19(0.18, 0.20) | 223(195.96, 249.04)    | 0.13(0.11, 0.14) | -36.52(-43.38 to -29.51)  | -31.64(-39.02, -24.09)   | -0.93(-1.04, -0.81) |
| <b>Regions</b>       |                         |                  |                        |                  |                           |                          |                     |
| Andean Latin America | 17 (12.38, 23.09)       | 0.12(0.08, 0.16) | 14(9.58, 18.29)        | 0.08(0.05, 0.10) | -22.13(-51.00 to 20.89)   | -36.08(-59.78, -0.78)    | -1.07(-1.18, -0.96) |

|                              |                      |                  |                      |                  |                           |                        |                     |
|------------------------------|----------------------|------------------|----------------------|------------------|---------------------------|------------------------|---------------------|
| Australasia                  | 8(6.69, 8.90)        | 0.17(0.15, 0.19) | 8(5.70, 10.27)       | 0.13(0.10, 0.18) | -0.39(-27.50 to 34.92)    | -20.29(-41.99, 7.96)   | -0.54(-0.70, -0.39) |
| Caribbean                    | 15(10.71, 20.53)     | 0.13(0.09, 0.18) | 21(14.59, 30.27)     | 0.18(0.13, 0.26) | 44.60(1.78 to 104.45)     | 43.43(0.96, 102.80)    | 1.67(1.41, 1.92)    |
| Central Asia                 | 5 (3.83, 6.82)       | 0.02(0.02, 0.03) | 7 (5.07, 10.18)      | 0.03(0.02, 0.04) | 41.11(-9.44 to 115.52)    | 27.42(-18.22, 94.62)   | 0.54(-0.01, 1.09)   |
| Central Europe               | 34(28.23, 40.12)     | 0.11(0.10, 0.14) | 14(11.24, 17.16)     | 0.08(0.06, 0.10) | -58.64(-69.45 to -43.86)  | -31.11(-49.11, -6.50)  | -0.17(-0.58, 0.25)  |
| Central Latin America        | 75(68.18, 82.53)     | 0.12(0.11, 0.13) | 56 (43.28, 72.57)    | 0.09(0.07, 0.11) | -25.06(-43.11 to -2.85)   | -24.01(-42.30, -1.48)  | 0.28(-0.15, 0.72)   |
| Central Sub - Saharan Africa | 7 (2.91, 13.60)      | 0.03(0.01, 0.05) | 12(7.84, 16.83)      | 0.02(0.01, 0.03) | 62.18(-10.99 to 271.34)   | -30.08(-61.63, 60.09)  | -0.76(-0.98, -0.54) |
| East Asia                    | 197(144.66, 259.99)  | 0.06(0.04, 0.08) | 166(119.26, 217.09)  | 0.06(0.04, 0.08) | -15.48(-42.98 to 28.82)   | 4.27(-29.66, 58.93)    | 1.80(1.44, 2.16)    |
| Eastern Europe               | 51(40.70, 66.03)     | 0.10(0.08, 0.13) | 21 (16.35, 25.94)    | 0.06(0.05, 0.07) | -57.99( -71.16 to -46.84) | -39.01(-58.13, -22.82) | -1.36(-1.46, -1.27) |
| Eastern Sub - Saharan Africa | 113(77.61, 187.76)   | 0.12(0.09, 0.21) | 237 (118.02, 394.53) | 0.13(0.07, 0.22) | 110.90(4.75 to 275.74)    | 7.05(-46.83, 90.72)    | 0.21(0.00, 0.42)    |
| High - income Asia Pacific   | 76 (68.28, 86.50)    | 0.22(0.19, 0.25) | 38 (33.68, 42.90)    | 0.17(0.15, 0.19) | -50.00(-58.59 to -41.21)  | -21.52(-35.00, -7.72)  | -0.72(-0.93, -0.50) |
| High - income North America  | 140 (129.33, 149.86) | 0.23(0.21, 0.24) | 91 (78.84, 104.02)   | 0.14(0.12, 0.16) | -34.99(-44.10 to -25.88)  | -38.90(-47.46, -30.34) | -1.39(-1.48, -1.29) |
| North Africa and Middle East | 99 (69.43, 142.20)   | 0.07(0.05, 0.10) | 114(82.47, 151.78)   | 0.06(0.04, 0.08) | 15.04(-30.99 to 95.02)    | -11.84(-47.12, 49.45)  | 0.27(0.11, 0.44)    |
| Oceania                      | 0.11(0.06, 0.20)     | 0.00(0.00, 0.01) | 0.18(0.10, 0.30)     | 0.00(0.00, 0.01) | 54.28(-14.97 to 180.16)   | -18.63(-55.15, 47.77)  | -0.51(-0.98, -0.04) |

|                               |                      |                  |                     |                  |                         |                        |                     |
|-------------------------------|----------------------|------------------|---------------------|------------------|-------------------------|------------------------|---------------------|
| South Asia                    | 349 (235.49, 482.28) | 0.08(0.05, 0.11) | 570(388.20, 802.74) | 0.11(0.08, 0.16) | 63.12(3.22 to 169.55)   | 39.42(-11.78, 130.39)  | 1.13(0.91, 1.34)    |
| Southeast Asia                | 99(69.57, 136.78)    | 0.06(0.04, 0.08) | 117 (90.75, 149.20) | 0.07(0.05, 0.09) | 18.92(-13.36 to 71.71)  | 17.60(-14.32, 69.82)   | 0.82(0.72, 0.93)    |
| Southern Latin America        | 17(13.09, 22.32)     | 0.11(0.09, 0.15) | 19(13.29, 25.41)    | 0.13(0.09, 0.18) | 10.05(-25.69 to 63.58)  | 13.32(-23.48, 68.45)   | 1.03(0.74, 1.32)    |
| Southern Sub - Saharan Africa | 12(8.60, 15.54)      | 0.06(0.04, 0.08) | 17 (12.76, 22.77)   | 0.07(0.05, 0.09) | 47.85(-2.24 to 115.38)  | 27.10(-15.95, 85.17)   | 0.76(0.52, 1.00)    |
| Tropical Latin America        | 98 (84.24, 112.25)   | 0.18(0.16, 0.21) | 86 (65.95, 106.08)  | 0.17(0.13, 0.21) | -12.31(-32.76 to 12.27) | -6.33(-28.17, 19.92)   | 0.83(0.50, 1.16)    |
| Western Europe                | 156 (148.72, 164.27) | 0.22(0.21, 0.23) | 104 (87.93, 123.65) | 0.15(0.13, 0.18) | -33.22(-44.03 to 20.34) | -30.38(-41.65, -16.95) | -0.70(-0.87, -0.53) |
| Western Sub - Saharan Africa  | 76(21.62, 120.16)    | 0.09(0.02, 0.14) | 265(66.82, 462.49)  | 0.12(0.03, 0.22) | 246.11(97.98 to 399.66) | 41.63(-18.99, 104.46)  | 1.04(0.78, 1.29)    |

Abbreviations: EAPC, estimated annual percentage change; SDI, Sociodemographic Index; UI, uncertainty interval.

<sup>a</sup>EAPC is expressed as 95% confidence interval. <sup>b</sup> Change shows the percentage change.

**Table S2. DALYs of Neuroblastoma in Children Between 1990 and 2021 at the Global and Regional Level.**

| location        | Rate per 100 000(95%UI)       |                    |                                |                   |                           |                          |                     |
|-----------------|-------------------------------|--------------------|--------------------------------|-------------------|---------------------------|--------------------------|---------------------|
|                 | 1990                          |                    | 2021                           |                   | 1990-2021                 |                          |                     |
|                 | Number of DALYs               | DALYs rate         | Number of DALYs                | DALYs rate        | Cases change <sup>b</sup> | Rate change <sup>b</sup> | EAPC <sup>a</sup>   |
| Global          | 145057.36(120924.76-173294.3) | 8.34(6.95-9.96)    | 174186.30(127104.64-223265.92) | 8.66(6.32-11.10)  | 20.08(-12.89-63.27)       | 3.80(-24.69-41.14)       | 0.45(0.32-0.57)     |
| <b>SDI</b>      |                               |                    |                                |                   |                           |                          |                     |
| Low SDI         | 16054.22(10755.50-24982.99)   | 7.01(4.70-10.91)   | 38449.70(20758.04-61655.36)    | 8.35(4.51-13.40)  | 139.50(31.59-293.40)      | 19.13(-34.55-95.67)      | 0.83(0.43-1.22)     |
| Low-middle SDI  | 32911.41(24850.00-43611.56)   | 6.97(5.26-9.24)    | 54242.65(38164.86-72461.29)    | 9.35(6.58-12.50)  | 64.81(11.30-151.72)       | 34.19(-9.37-104.95)      | 1.36(1.15-1.57)     |
| Middle SDI      | 39660.93(32221.61-46615.78)   | 6.87(5.58-8.08)    | 42712.62(31748.88-53985.24)    | 7.53(5.60-9.52)   | 7.69(-18.55-44.69)        | 9.66(-17.06-47.33)       | 0.73(0.52-0.95)     |
| High-middle SDI | 25479.35(21510.78-29833.77)   | 9.31(7.86-10.90)   | 19178.88(14878.35-23223.51)    | 8.31(6.44-10.06)  | -24.73(-42.74, -0.60)     | -10.80(-32.15-17.80)     | 0.23(-0.06-0.53)    |
| High SDI        | 30823.93(29178.43-32348.24)   | 16.59(15.70-17.41) | 19471.08(17170.44-21760.02)    | 11.29(9.95-12.61) | -36.83(-43.68, -29.75)    | -31.97(-39.35, -24.35)   | -1.14(-1.32, -0.96) |

## Regions

|                       |                          |                    |                          |                    |                        |                       |                     |
|-----------------------|--------------------------|--------------------|--------------------------|--------------------|------------------------|-----------------------|---------------------|
| Andean Latin America  | 1539.32(1085.19-2028.54) | 10.36(7.31-13.66)  | 1185.33(825.32-1590.76)  | 6.55(4.56-8.79)    | -23.00(-51.83-20.18)   | -36.80(-60.46, -1.36) | -1.06(-1.20, -0.91) |
| Australasia           | 681.63(590.11-786.94)    | 14.86(12.87-17.16) | 673.01(497.29-895.97)    | 11.74(8.68-15.63)  | -1.26(-28.42-33.88)    | -20.99(-42.73-7.13)   | -0.60(-0.84, -0.35) |
| Caribbean             | 1282.59(939.78-1819.10)  | 11.24(8.23-15.94)  | 1843.66(1271.81-2664.23) | 16.02(11.05-23.16) | 43.75(1.09-103.12)     | 42.59(0.28-101.49)    | 1.29(0.88-1.70)     |
| Central Asia          | 448.69(336.88-603.67)    | 1.80(1.35-2.42)    | 627.20(443.28-890.98)    | 2.27(1.60-3.22)    | 39.78(-10.36-113.38)   | 26.23(-19.05-92.68)   | 2.24(1.75-2.73)     |
| Central Europe        | 2943.83(2481.05-3515.55) | 9.98(8.42-11.92)   | 1215.51(981.35-1509.94)  | 6.87(5.54-8.53)    | -58.71(-69.63, -43.85) | -31.23(-49.41, -6.47) | -1.12(-1.66, -0.59) |
| Central Latin America | 6578.94(5985.40-7309.25) | 10.22(9.30-11.35)  | 4887.59(3777.06-6352.14) | 7.70(5.95-10.01)   | -25.71(-43.89, -3.29)  | -24.66(-43.10, -1.92) | -0.66(-1.25, -0.07) |



|                              |                             |                    |                             |                    |                        |                        |                     |
|------------------------------|-----------------------------|--------------------|-----------------------------|--------------------|------------------------|------------------------|---------------------|
| Central Sub-Saharan Africa   | 628.00(254.17-1202.85)      | 2.48(1.00-4.75)    | 1007.95(678.11-1476.82)     | 1.72(1.16-2.52)    | 60.50(-11.96-270.60)   | -30.80(-62.05-59.77)   | -0.74(-1.10, -0.38) |
| East Asia                    | 17375.53(12725.07-23038.73) | 5.27(3.86-6.98)    | 14533.97(10424.79-19097.23) | 5.44(3.90-7.14)    | -16.35(-43.78-27.59)   | 3.19(-30.64-57.41)     | 1.01(0.56-1.45)     |
| Eastern Europe               | 4477.83(3581.49-5824.17)    | 8.70(6.96-11.32)   | 1874.38(1430.73-2277.46)    | 5.29(4.04-6.43)    | -58.14(-71.28, -47.00) | -39.22(-58.31, -23.04) | -1.49(-1.61, -1.38) |
| Eastern Sub-Saharan Africa   | 10064.63(6947.72-16716.11)  | 11.11(7.67-18.46)  | 21144.77(10474.68-35062.81) | 11.85(5.87-19.65)  | 110.09(4.48-272.91)    | 6.64(-46.97-89.29)     | 0.60(0.30-0.91)     |
| High-income Asia Pacific     | 6638.99(5968.00-7530.02)    | 18.86(16.95-21.39) | 3319.78(2927.64-3744.69)    | 14.80(13.05-16.70) | -50.00(-58.59, -41.39) | -21.51(-35.01, -8.00)  | -1.12(-1.42, -0.81) |
| High-income North America    | 12291.86(11387.24-13176.74) | 19.93(18.46-21.36) | 7925.34(6843.57-9067.63)    | 12.08(10.43-13.82) | -35.52(-44.51, -26.35) | -39.40(-47.85, -30.77) | -1.32(-1.48, -1.16) |
| North Africa and Middle East | 8735.94(6124.25-12544.18)   | 6.22(4.36-8.93)    | 9986.29(7196.85-13356.37)   | 5.45(3.93-7.29)    | 14.31(-31.54-94.26)    | -12.40(-47.53-48.87)   | 0.14(-0.15-0.43)    |

|                             |                             |                    |                             |                    |                        |                        |                     |
|-----------------------------|-----------------------------|--------------------|-----------------------------|--------------------|------------------------|------------------------|---------------------|
| Oceania                     | 9.93(5.26-17.31)            | 0.37(0.20-0.65)    | 15.35(8.89-26.06)           | 0.30(0.17-0.51)    | 54.60(-14.56-180.10)   | -18.46(-54.94-47.74)   | -1.58(-2.18, -0.98) |
| South Asia                  | 31073.60(20840.55-42991.32) | 7.17(4.81-9.92)    | 50618.87(34477.60-71561.32) | 9.98(6.80-14.11)   | 62.90(3.07-169.37)     | 39.23(-11.91-130.24)   | 1.41(1.05-1.76)     |
| Southeast Asia              | 8661.06(6086.41-12071.58)   | 5.07(3.56-7.07)    | 10278.81(7962.80-13112.13)  | 5.95(4.61-7.59)    | 18.68(-13.76-71.55)    | 17.37(-14.71-69.66)    | 0.54(0.44-0.64)     |
| Southern Latin America      | 1472.04(1146.11-1935.18)    | 9.86(7.68-12.96)   | 1606.19(1148.76-2197.36)    | 11.08(7.92-15.16)  | 9.11(-26.10-62.03)     | 12.36(-23.91-66.85)    | 0.83(0.35-1.32)     |
| Southern Sub-Saharan Africa | 1017.73(757.04-1377.40)     | 4.92(3.66-6.66)    | 1498.40(1120.59-1993.48)    | 6.23(4.66-8.28)    | 47.23(-2.92-115.01)    | 26.57(-16.54-84.84)    | 1.14(0.76-1.52)     |
| Tropical Latin America      | 8613.62(7390.33-9856.00)    | 16.07(13.78-18.38) | 7497.26(5739.12-9255.19)    | 14.94(11.43-18.44) | -12.96(-33.48-11.78)   | -7.03(-28.95-19.40)    | 0.22(-0.27-0.71)    |
| Western Europe              | 13757.00(13112.60-14516.63) | 19.37(18.46-20.44) | 9151.27(7710.31-10854.85)   | 13.43(11.32-15.94) | -33.48(-44.40, -20.50) | -30.65(-42.03, -17.12) | -1.09(-1.29, -0.89) |
| Western Sub-Saharan Africa  | 6764.58(1913.43-10541.81)   | 7.70(2.18-12.00)   | 23295.36(5871.95-40807.72)  | 10.85(2.73-19.00)  | 244.37(96.22-398.76)   | 40.91(-19.71-104.09)   | 1.48(1.10-1.86)     |

Abbreviations: DALYs, disability adjusted life years; EAPC, estimated annual percentage change; SDI, Sociodemographic Index; UI, uncertainty interval.

<sup>a</sup>EAPC is expressed as 95% confidence interval. <sup>b</sup> Change shows the percentage change.

**Table S3. Incidence of neuroblastoma in children, by countries and territories, 1990-2021.**

| location            | Rate per 100 000 (95%UI) |                 |                    |                 |                     |
|---------------------|--------------------------|-----------------|--------------------|-----------------|---------------------|
|                     | 1990                     |                 | 2021               |                 | 1990-2021           |
|                     | Incident cases           | Incident rate   | Incident cases     | Incident rate   | EAPC <sup>a</sup>   |
| Afghanistan         | 0.24(0.03-1.35)          | 0.01(0.00-0.03) | 1.78(0.54-6.62)    | 0.01(0.00-0.05) | 3.23(2.80-3.65)     |
| Albania             | 1.41(0.86-2.16)          | 0.13(0.08-0.19) | 0.79(0.32-1.42)    | 0.18(0.07-0.32) | 1.16(0.82-1.50)     |
| Algeria             | 31.50(16.61-54.36)       | 0.29(0.15-0.51) | 37.70(22.83-61.37) | 0.28(0.17-0.46) | -0.03(-0.23-0.17)   |
| American Samoa      | 0.00(0.00-0.00)          | 0.00(0.00-0.00) | 0.00(0.00-0.00)    | 0.00(0.00-0.00) | -0.49(-1.40-0.43)   |
| Andorra             | 0.09(0.05-0.15)          | 0.93(0.53-1.57) | 0.03(0.02-0.05)    | 0.34(0.19-0.54) | -2.66(-3.05, -2.27) |
| Angola              | 3.28(0.92-8.34)          | 0.07(0.02-0.18) | 11.12(5.92-20.27)  | 0.07(0.04-0.13) | 0.17(0.03-0.30)     |
| Antigua and Barbuda | 0.05(0.02-0.09)          | 0.28(0.14-0.50) | 0.07(0.05-0.12)    | 0.44(0.27-0.71) | 1.48(1.15-1.81)     |
| Argentina           | 38.87(27.04-54.82)       | 0.38(0.27-0.54) | 46.22(31.19-66.85) | 0.45(0.31-0.66) | 1.16(0.83-1.49)     |
| Armenia             | 0.45(0.21-0.91)          | 0.04(0.02-0.09) | 0.63(0.32-1.09)    | 0.11(0.05-0.18) | 5.08(4.19-5.98)     |

|            |                     |                 |                     |                 |                     |
|------------|---------------------|-----------------|---------------------|-----------------|---------------------|
| Australia  | 23.88(19.20-29.35)  | 0.63(0.51-0.78) | 25.41(17.82-35.55)  | 0.53(0.38-0.75) | -0.48(-0.74, -0.22) |
| Austria    | 8.26(6.64-10.29)    | 0.61(0.49-0.76) | 4.86(3.25-6.92)     | 0.37(0.25-0.53) | -1.30(-1.55, -1.05) |
| Azerbaijan | 1.37(0.68-2.53)     | 0.06(0.03-0.10) | 1.27(0.65-2.22)     | 0.05(0.03-0.09) | 1.02(0.48-1.57)     |
| Bahrain    | 0.14(0.07-0.26)     | 0.08(0.04-0.16) | 0.60(0.34-1.02)     | 0.20(0.11-0.34) | 5.13(4.17-6.10)     |
| Bangladesh | 70.70(33.00-135.64) | 0.14(0.07-0.28) | 92.18(51.65-155.24) | 0.20(0.11-0.34) | 1.29(0.90-1.68)     |
| Barbados   | 0.60(0.39-0.88)     | 0.96(0.63-1.41) | 0.46(0.29-0.72)     | 0.97(0.62-1.52) | 0.47(0.20-0.74)     |
| Belarus    | 8.18(5.16-12.27)    | 0.34(0.21-0.51) | 3.34(2.03-5.02)     | 0.21(0.13-0.32) | -1.20(-1.73, -0.67) |
| Belgium    | 11.09(8.46-14.63)   | 0.61(0.47-0.81) | 9.46(6.39-13.58)    | 0.49(0.33-0.71) | -1.12(-1.38, -0.86) |
| Belize     | 0.41(0.25-0.62)     | 0.50(0.30-0.76) | 0.65(0.41-0.97)     | 0.53(0.34-0.79) | 0.56(-0.41-1.54)    |
| Benin      | 0.98(0.40-1.89)     | 0.04(0.02-0.08) | 0.48(0.19-1.22)     | 0.01(0.00-0.02) | -6.28(-7.02, -5.53) |
| Bermuda    | 0.02(0.01-0.03)     | 0.14(0.08-0.23) | 0.03(0.02-0.04)     | 0.30(0.20-0.44) | 3.26(2.32-4.20)     |
| Bhutan     | 0.28(0.09-0.64)     | 0.11(0.03-0.24) | 0.40(0.16-0.78)     | 0.21(0.09-0.42) | 2.55(2.27-2.83)     |
| Bolivia    | 7.74(3.79-14.45)    | 0.29(0.14-0.54) | 9.63(5.26-15.59)    | 0.28(0.15-0.45) | 0.07(-0.06-0.20)    |

|                          |                       |                 |                       |                 |                     |
|--------------------------|-----------------------|-----------------|-----------------------|-----------------|---------------------|
| Bosnia and Herzegovina   | 1.24(0.67-2.18)       | 0.11(0.06-0.20) | 0.68(0.41-1.06)       | 0.14(0.08-0.22) | 1.83(1.26-2.40)     |
| Botswana                 | 0.39(0.20-0.72)       | 0.07(0.03-0.12) | 1.24(0.56-2.65)       | 0.18(0.08-0.38) | 4.17(3.63-4.71)     |
| Brazil                   | 235.69(166.68-321.40) | 0.45(0.32-0.62) | 236.04(165.32-314.57) | 0.49(0.34-0.65) | 0.68(0.11-1.25)     |
| Brunei                   | 0.40(0.23-0.67)       | 0.45(0.26-0.73) | 0.40(0.25-0.60)       | 0.42(0.27-0.63) | 0.00(-0.24-0.25)    |
| Bulgaria                 | 3.50(1.84-5.95)       | 0.20(0.11-0.34) | 1.94(0.98-3.45)       | 0.20(0.10-0.35) | -0.40(-1.20-0.41)   |
| Burkina Faso             | 1.16(0.42-2.39)       | 0.02(0.01-0.05) | 0.49(0.16-1.34)       | 0.00(0.00-0.01) | -5.91(-6.60, -5.22) |
| Burundi                  | 5.92(2.92-11.62)      | 0.23(0.11-0.44) | 7.33(1.97-19.25)      | 0.13(0.03-0.33) | -0.76(-1.27, -0.24) |
| Cambodia                 | 2.75(1.10-5.25)       | 0.06(0.02-0.11) | 3.86(1.93-7.24)       | 0.08(0.04-0.14) | 1.02(0.69-1.35)     |
| Cameroon                 | 2.36(0.93-4.77)       | 0.05(0.02-0.10) | 1.27(0.57-3.22)       | 0.01(0.00-0.02) | -5.84(-6.57, -5.09) |
| Canada                   | 46.21(35.35-58.34)    | 0.80(0.61-1.01) | 31.96(21.59-49.15)    | 0.52(0.35-0.80) | -1.24(-1.53, -0.96) |
| Cape Verde               | 0.00(0.00-0.00)       | 0.00(0.00-0.00) | 0.00(0.00-0.00)       | 0.00(0.00-0.00) | 3.99(3.74-4.25)     |
| Central African Republic | 0.58(0.22-1.32)       | 0.05(0.02-0.11) | 0.87(0.35-1.81)       | 0.04(0.02-0.08) | -0.45(-0.64, -0.26) |
| Chad                     | 0.57(0.23-1.22)       | 0.02(0.01-0.04) | 0.36(0.12-1.03)       | 0.00(0.00-0.01) | -5.86(-6.54, -5.18) |

|                                  |                       |                 |                       |                 |                     |
|----------------------------------|-----------------------|-----------------|-----------------------|-----------------|---------------------|
| Chile                            | 4.65(3.42-6.45)       | 0.12(0.09-0.16) | 9.91(6.95-13.74)      | 0.27(0.19-0.38) | 3.01(1.73-4.30)     |
| China                            | 486.59(308.18-743.40) | 0.15(0.10-0.23) | 553.02(373.13-746.77) | 0.21(0.14-0.29) | 2.13(1.62-2.65)     |
| Colombia                         | 30.62(19.95-43.78)    | 0.26(0.17-0.38) | 37.69(23.53-56.67)    | 0.36(0.22-0.53) | 1.52(0.78-2.26)     |
| Comoros                          | 0.60(0.25-1.20)       | 0.28(0.12-0.57) | 1.07(0.46-2.24)       | 0.44(0.19-0.93) | 1.16(0.91-1.41)     |
| Congo                            | 1.00(0.40-2.10)       | 0.09(0.04-0.20) | 1.72(0.85-3.24)       | 0.09(0.04-0.17) | -0.01(-0.23-0.22)   |
| Cook Islands                     | 0.00(0.00-0.00)       | 0.01(0.00-0.02) | 0.00(0.00-0.00)       | 0.02(0.00-0.06) | 0.75(-0.17-1.69)    |
| Costa Rica                       | 4.38(3.01-6.02)       | 0.39(0.27-0.54) | 2.61(1.75-3.75)       | 0.26(0.17-0.37) | -0.82(-1.07, -0.57) |
| Cote d'Ivoire                    | 4.31(1.06-9.06)       | 0.08(0.02-0.16) | 10.73(2.61-25.58)     | 0.09(0.02-0.22) | 0.44(-0.05-0.94)    |
| Croatia                          | 4.45(3.29-5.94)       | 0.45(0.33-0.60) | 3.30(2.19-4.82)       | 0.55(0.37-0.81) | 0.86(0.55-1.17)     |
| Cuba                             | 10.51(7.30-15.28)     | 0.42(0.29-0.61) | 7.58(5.21-10.90)      | 0.43(0.29-0.61) | 1.17(0.53-1.81)     |
| Cyprus                           | 0.80(0.48-1.29)       | 0.40(0.24-0.65) | 0.96(0.61-1.58)       | 0.44(0.28-0.72) | 1.59(0.96-2.22)     |
| Czech Republic                   | 7.41(5.43-10.20)      | 0.34(0.25-0.46) | 5.25(3.27-8.04)       | 0.31(0.19-0.47) | -0.39(-0.81-0.05)   |
| Democratic Republic of the Congo | 9.84(3.64-20.30)      | 0.06(0.02-0.11) | 11.08(5.29-20.19)     | 0.03(0.01-0.05) | -1.57(-2.16, -0.98) |

|                                |                     |                 |                      |                 |                     |
|--------------------------------|---------------------|-----------------|----------------------|-----------------|---------------------|
| Denmark                        | 2.20(1.54-3.05)     | 0.25(0.17-0.35) | 5.53(3.55-8.17)      | 0.58(0.37-0.86) | 2.00(1.55-2.45)     |
| Djibouti                       | 0.70(0.27-1.38)     | 0.40(0.15-0.79) | 1.70(0.66-3.30)      | 0.41(0.16-0.80) | 0.41(0.13-0.68)     |
| Dominica                       | 0.06(0.03-0.10)     | 0.23(0.12-0.41) | 0.11(0.05-0.20)      | 0.79(0.35-1.49) | 3.96(3.38-4.53)     |
| Dominican Republic             | 5.35(2.71-13.05)    | 0.20(0.10-0.48) | 16.90(9.47-26.61)    | 0.58(0.32-0.91) | 2.20(1.29-3.12)     |
| Ecuador                        | 6.17(3.98-9.48)     | 0.16(0.10-0.25) | 10.33(6.34-16.33)    | 0.20(0.13-0.32) | 1.28(0.54-2.03)     |
| Egypt                          | 23.50(9.38-55.18)   | 0.11(0.04-0.25) | 37.47(21.26-75.20)   | 0.10(0.06-0.20) | 0.55(-0.29-1.40)    |
| El Salvador                    | 2.77(1.69-4.27)     | 0.13(0.08-0.20) | 1.89(1.18-2.93)      | 0.10(0.06-0.16) | -0.84(-1.15, -0.53) |
| Equatorial Guinea              | 0.10(0.04-0.22)     | 0.05(0.02-0.11) | 0.76(0.33-1.52)      | 0.13(0.06-0.26) | 3.14(2.75-3.53)     |
| Eritrea                        | 2.99(1.43-5.51)     | 0.19(0.09-0.35) | 7.91(3.08-16.96)     | 0.31(0.12-0.67) | 1.53(1.23-1.83)     |
| Estonia                        | 1.19(0.74-1.87)     | 0.34(0.21-0.54) | 0.50(0.29-0.84)      | 0.23(0.13-0.39) | -0.96(-1.25, -0.67) |
| Ethiopia                       | 38.42(13.25-119.45) | 0.16(0.05-0.49) | 101.06(37.29-300.99) | 0.23(0.08-0.68) | 1.23(0.55-1.91)     |
| Federated States of Micronesia | 0.00(0.00-0.01)     | 0.01(0.00-0.01) | 0.00(0.00-0.00)      | 0.01(0.00-0.01) | 0.01(-0.21-0.23)    |
| Fiji                           | 0.12(0.04-0.28)     | 0.04(0.01-0.10) | 0.12(0.04-0.28)      | 0.04(0.01-0.10) | -1.91(-3.17, -0.63) |

|               |                    |                 |                     |                 |                     |
|---------------|--------------------|-----------------|---------------------|-----------------|---------------------|
| Finland       | 1.76(1.35-2.33)    | 0.18(0.14-0.24) | 6.08(4.28-8.76)     | 0.72(0.51-1.03) | 4.10(3.14-5.06)     |
| France        | 66.48(52.68-81.56) | 0.57(0.45-0.70) | 51.69(36.63-72.30)  | 0.45(0.32-0.62) | -0.76(-0.99, -0.52) |
| Gabon         | 0.35(0.16-0.75)    | 0.09(0.04-0.18) | 0.75(0.39-1.31)     | 0.12(0.06-0.21) | 1.59(1.30-1.89)     |
| Georgia       | 0.14(0.07-0.25)    | 0.01(0.01-0.02) | 0.82(0.45-1.32)     | 0.11(0.06-0.18) | 12.66(11.11-14.22)  |
| Germany       | 61.66(45.68-82.19) | 0.48(0.35-0.63) | 75.51(51.53-105.19) | 0.63(0.43-0.88) | 0.61(0.17-1.06)     |
| Ghana         | 0.16(0.07-0.33)    | 0.00(0.00-0.00) | 0.16(0.05-0.56)     | 0.00(0.00-0.00) | -3.39(-4.62, -2.15) |
| Greece        | 5.34(4.40-6.48)    | 0.26(0.22-0.32) | 3.24(2.45-4.19)     | 0.23(0.18-0.30) | 0.30(-0.04-0.64)    |
| Greenland     | 0.06(0.04-0.10)    | 0.45(0.27-0.68) | 0.01(0.00-0.02)     | 0.08(0.04-0.21) | -5.25(-5.66, -4.83) |
| Grenada       | 0.07(0.04-0.11)    | 0.20(0.11-0.33) | 0.07(0.04-0.11)     | 0.31(0.18-0.49) | 2.10(1.55-2.66)     |
| Guam          | 0.00(0.00-0.00)    | 0.01(0.00-0.01) | 0.00(0.00-0.01)     | 0.01(0.00-0.01) | 2.94(1.43-4.47)     |
| Guatemala     | 3.98(2.08-7.41)    | 0.10(0.05-0.18) | 4.21(2.66-6.12)     | 0.09(0.05-0.12) | -0.61(-1.01, -0.20) |
| Guinea        | 6.26(1.50-12.43)   | 0.23(0.05-0.45) | 11.22(2.60-25.47)   | 0.19(0.04-0.42) | -0.42(-0.66, -0.19) |
| Guinea-Bissau | 0.18(0.07-0.36)    | 0.04(0.02-0.07) | 0.04(0.01-0.11)     | 0.00(0.00-0.01) | -7.45(-7.86, -7.05) |



|           |                       |                 |                        |                 |                     |
|-----------|-----------------------|-----------------|------------------------|-----------------|---------------------|
| Guyana    | 0.07(0.04-0.11)       | 0.02(0.01-0.04) | 0.97(0.51-1.58)        | 0.45(0.24-0.74) | 8.52(5.96-11.15)    |
| Haiti     | 8.28(2.25-18.33)      | 0.31(0.08-0.68) | 16.73(6.52-34.08)      | 0.38(0.15-0.78) | 1.29(1.12-1.46)     |
| Honduras  | 3.23(1.75-5.73)       | 0.15(0.08-0.26) | 4.61(2.39-8.34)        | 0.14(0.07-0.25) | -0.17(-0.48-0.15)   |
| Hungary   | 6.93(5.00-9.25)       | 0.33(0.23-0.43) | 4.93(3.34-7.08)        | 0.36(0.24-0.51) | -0.26(-0.95-0.43)   |
| Iceland   | 0.31(0.23-0.42)       | 0.50(0.37-0.66) | 0.34(0.21-0.56)        | 0.50(0.31-0.83) | 1.16(0.44-1.89)     |
| India     | 496.98(269.79-795.97) | 0.15(0.08-0.24) | 685.49(404.16-1007.67) | 0.19(0.11-0.28) | 0.72(0.33-1.11)     |
| Indonesia | 61.78(29.57-114.44)   | 0.09(0.04-0.17) | 103.30(64.34-166.82)   | 0.15(0.10-0.25) | 1.51(1.38-1.65)     |
| Iran      | 4.65(2.37-8.79)       | 0.02(0.01-0.03) | 8.31(3.63-13.57)       | 0.04(0.02-0.07) | 5.26(4.33-6.20)     |
| Iraq      | 10.27(5.86-18.07)     | 0.12(0.07-0.22) | 34.36(20.36-59.16)     | 0.26(0.15-0.44) | 2.71(2.44-2.99)     |
| Ireland   | 5.54(4.16-7.30)       | 0.56(0.42-0.74) | 3.38(2.25-4.81)        | 0.34(0.23-0.48) | -0.77(-1.25, -0.30) |
| Israel    | 10.69(7.34-14.40)     | 0.70(0.48-0.94) | 12.37(8.43-17.46)      | 0.47(0.32-0.66) | -0.83(-1.23, -0.43) |
| Italy     | 95.66(79.59-113.10)   | 1.04(0.86-1.23) | 68.28(49.94-88.35)     | 0.90(0.66-1.16) | -0.61(-0.94, -0.27) |
| Jamaica   | 3.70(2.51-5.20)       | 0.44(0.30-0.62) | 4.54(2.71-7.45)        | 0.78(0.46-1.28) | 1.97(1.17-2.78)     |

|            |                       |                 |                      |                 |                     |
|------------|-----------------------|-----------------|----------------------|-----------------|---------------------|
| Japan      | 178.38(152.11-206.54) | 0.77(0.66-0.89) | 112.45(92.43-132.17) | 0.73(0.60-0.86) | -0.59(-1.03, -0.15) |
| Jordan     | 4.81(2.86-8.05)       | 0.29(0.18-0.49) | 13.85(8.66-22.50)    | 0.38(0.24-0.62) | 1.17(0.87-1.48)     |
| Kazakhstan | 1.19(0.69-1.94)       | 0.02(0.01-0.04) | 2.03(1.14-3.41)      | 0.04(0.02-0.06) | 2.46(1.99-2.92)     |
| Kenya      | 10.95(5.44-21.75)     | 0.10(0.05-0.19) | 23.68(11.49-41.29)   | 0.13(0.06-0.22) | 1.33(1.01-1.65)     |
| Kiribati   | 0.00(0.00-0.00)       | 0.00(0.00-0.01) | 0.00(0.00-0.00)      | 0.00(0.00-0.01) | 0.42(0.21-0.63)     |
| Kuwait     | 1.60(1.07-2.22)       | 0.29(0.19-0.40) | 3.11(2.04-4.61)      | 0.37(0.24-0.55) | 4.51(2.32-6.76)     |
| Kyrgyzstan | 3.12(1.60-5.59)       | 0.19(0.10-0.33) | 0.89(0.55-1.43)      | 0.04(0.02-0.06) | 1.87(-1.21-5.04)    |
| Laos       | 0.94(0.31-2.11)       | 0.05(0.02-0.11) | 1.98(0.96-3.66)      | 0.09(0.04-0.16) | 1.97(1.74-2.21)     |
| Latvia     | 1.60(0.96-2.63)       | 0.28(0.17-0.46) | 0.26(0.14-0.45)      | 0.09(0.05-0.15) | -2.01(-2.76, -1.24) |
| Lebanon    | 1.85(1.09-2.95)       | 0.18(0.10-0.28) | 2.87(1.33-5.45)      | 0.22(0.10-0.43) | 1.54(1.21-1.86)     |
| Lesotho    | 0.28(0.14-0.52)       | 0.04(0.02-0.08) | 0.38(0.18-0.71)      | 0.06(0.03-0.11) | 1.72(1.26-2.18)     |
| Liberia    | 0.48(0.20-0.88)       | 0.04(0.02-0.08) | 0.09(0.03-0.23)      | 0.00(0.00-0.01) | -7.47(-8.55, -6.37) |
| Libya      | 6.05(3.13-11.26)      | 0.33(0.17-0.62) | 8.82(4.72-15.90)     | 0.59(0.32-1.07) | 2.47(1.99-2.95)     |

|                  |                      |                 |                     |                 |                     |
|------------------|----------------------|-----------------|---------------------|-----------------|---------------------|
| Lithuania        | 2.24(1.42-3.50)      | 0.27(0.17-0.42) | 0.71(0.44-1.08)     | 0.17(0.11-0.27) | -0.68(-1.12, -0.24) |
| Luxembourg       | 0.42(0.32-0.53)      | 0.63(0.48-0.80) | 0.36(0.26-0.48)     | 0.35(0.25-0.48) | -2.68(-3.12, -2.24) |
| Macedonia        | 1.49(0.95-2.32)      | 0.28(0.18-0.44) | 0.53(0.29-0.85)     | 0.16(0.09-0.26) | -0.28(-0.75-0.19)   |
| Madagascar       | 16.18(8.70-28.91)    | 0.30(0.16-0.53) | 26.21(11.08-52.39)  | 0.22(0.09-0.45) | -0.60(-0.97, -0.23) |
| Malawi           | 48.62(26.23-83.74)   | 1.07(0.58-1.84) | 73.08(25.14-163.98) | 0.90(0.31-2.02) | -0.19(-0.44-0.06)   |
| Malaysia         | 11.36(5.82-18.96)    | 0.17(0.09-0.29) | 18.03(11.13-27.05)  | 0.24(0.15-0.36) | 1.21(0.78-1.63)     |
| Maldives         | 0.43(0.17-1.09)      | 0.41(0.16-1.03) | 0.83(0.51-1.31)     | 0.83(0.50-1.31) | 3.24(2.78-3.70)     |
| Mali             | 3.74(0.74-7.89)      | 0.09(0.02-0.19) | 8.60(1.84-20.45)    | 0.07(0.02-0.18) | -0.69(-0.90, -0.48) |
| Malta            | 0.98(0.67-1.34)      | 1.12(0.77-1.53) | 0.87(0.55-1.28)     | 1.35(0.86-2.00) | 0.65(0.23-1.08)     |
| Marshall Islands | 0.00(0.00-0.00)      | 0.00(0.00-0.01) | 0.00(0.00-0.00)     | 0.01(0.00-0.01) | 1.92(1.61-2.24)     |
| Mauritania       | 0.40(0.17-0.80)      | 0.04(0.02-0.09) | 0.17(0.07-0.55)     | 0.01(0.00-0.03) | -6.24(-6.81, -5.66) |
| Mauritius        | 0.31(0.23-0.43)      | 0.10(0.07-0.13) | 0.42(0.30-0.59)     | 0.20(0.15-0.28) | 2.48(1.51-3.47)     |
| Mexico           | 103.09(73.75-137.47) | 0.31(0.22-0.41) | 81.17(55.38-116.61) | 0.25(0.17-0.36) | -0.59(-1.40-0.23)   |

|             |                      |                 |                        |                 |                     |
|-------------|----------------------|-----------------|------------------------|-----------------|---------------------|
| Moldova     | 1.58(1.05-2.36)      | 0.13(0.08-0.19) | 0.87(0.57-1.23)        | 0.17(0.11-0.24) | 2.17(1.74-2.60)     |
| Mongolia    | 0.43(0.18-0.93)      | 0.05(0.02-0.10) | 0.68(0.36-1.22)        | 0.06(0.03-0.11) | 1.99(1.40-2.60)     |
| Montenegro  | 0.51(0.31-0.81)      | 0.32(0.19-0.50) | 0.17(0.10-0.28)        | 0.15(0.09-0.25) | -1.27(-1.62, -0.91) |
| Morocco     | 33.18(18.25-52.93)   | 0.34(0.19-0.54) | 38.13(19.72-72.09)     | 0.39(0.20-0.74) | 1.19(0.87-1.50)     |
| Mozambique  | 17.21(8.14-35.17)    | 0.28(0.13-0.57) | 34.34(11.12-81.27)     | 0.24(0.08-0.57) | -0.25(-0.53-0.04)   |
| Myanmar     | 11.48(4.21-22.83)    | 0.08(0.03-0.15) | 20.91(11.27-34.59)     | 0.13(0.07-0.22) | 2.14(2.00-2.28)     |
| Namibia     | 1.07(0.50-1.96)      | 0.18(0.08-0.33) | 3.23(1.51-6.11)        | 0.39(0.18-0.74) | 3.36(2.87-3.86)     |
| Nepal       | 8.81(4.28-17.76)     | 0.10(0.05-0.21) | 10.42(4.50-19.32)      | 0.11(0.05-0.21) | 0.64(0.38-0.90)     |
| Netherlands | 26.12(20.23-33.10)   | 0.96(0.74-1.21) | 13.84(9.61-19.72)      | 0.52(0.36-0.74) | -2.51(-2.87, -2.15) |
| New Zealand | 4.46(3.30-5.96)      | 0.56(0.41-0.74) | 3.36(2.53-4.36)        | 0.34(0.26-0.44) | -0.93(-1.63, -0.23) |
| Nicaragua   | 8.89(5.19-14.52)     | 0.49(0.28-0.80) | 5.02(3.17-7.95)        | 0.25(0.16-0.40) | -1.53(-1.92, -1.13) |
| Niger       | 1.02(0.41-2.11)      | 0.03(0.01-0.05) | 0.27(0.08-0.70)        | 0.00(0.00-0.01) | -8.81(-9.56, -8.06) |
| Nigeria     | 147.30(39.83-274.04) | 0.38(0.10-0.70) | 620.01(145.50-1154.47) | 0.61(0.14-1.14) | 2.02(1.61-2.44)     |

|                          |                      |                 |                        |                 |                     |
|--------------------------|----------------------|-----------------|------------------------|-----------------|---------------------|
| North Korea              | 8.95(4.71-15.20)     | 0.15(0.08-0.26) | 4.22(1.84-8.64)        | 0.09(0.04-0.18) | -1.11(-1.44, -0.79) |
| Northern Mariana Islands | 0.00(0.00-0.00)      | 0.00(0.00-0.00) | 0.00(0.00-0.00)        | 0.00(0.00-0.00) | 3.10(2.00-4.20)     |
| Norway                   | 3.01(2.46-3.59)      | 0.38(0.31-0.45) | 1.60(1.26-2.01)        | 0.17(0.14-0.22) | -3.34(-3.90, -2.77) |
| Oman                     | 1.18(0.35-2.51)      | 0.14(0.04-0.30) | 1.94(1.11-3.00)        | 0.16(0.09-0.25) | 1.15(0.43-1.89)     |
| Pakistan                 | 178.42(94.63-328.32) | 0.36(0.19-0.67) | 658.18(346.71-1128.07) | 0.77(0.41-1.32) | 3.48(3.02-3.94)     |
| Palestine                | 2.11(1.11-4.02)      | 0.22(0.11-0.42) | 6.37(3.76-10.07)       | 0.34(0.20-0.54) | 2.45(1.89-3.01)     |
| Panama                   | 3.27(2.27-4.49)      | 0.39(0.27-0.54) | 4.61(3.24-6.44)        | 0.40(0.28-0.56) | -0.37(-0.62, -0.11) |
| Papua New Guinea         | 0.05(0.02-0.12)      | 0.00(0.00-0.01) | 0.19(0.08-0.35)        | 0.00(0.00-0.01) | 0.80(0.51-1.09)     |
| Paraguay                 | 4.39(2.42-7.43)      | 0.26(0.15-0.45) | 7.22(3.91-12.88)       | 0.36(0.19-0.64) | 1.20(0.84-1.56)     |
| Peru                     | 27.42(15.03-43.30)   | 0.33(0.18-0.52) | 18.44(10.90-29.27)     | 0.19(0.11-0.31) | -1.22(-1.53, -0.91) |
| Philippines              | 50.19(29.65-79.80)   | 0.20(0.12-0.32) | 78.41(51.99-110.03)    | 0.23(0.15-0.32) | 0.86(0.64-1.08)     |
| Poland                   | 24.74(19.36-31.49)   | 0.26(0.20-0.33) | 13.33(10.04-16.84)     | 0.23(0.17-0.29) | -0.37(-1.50-0.77)   |
| Portugal                 | 21.30(16.18-27.16)   | 1.01(0.76-1.28) | 7.53(5.39-10.78)       | 0.55(0.40-0.79) | -2.15(-2.36, -1.94) |

|                                  |                     |                 |                    |                 |                     |
|----------------------------------|---------------------|-----------------|--------------------|-----------------|---------------------|
| Principality of Monaco           | 0.00(0.00-0.00)     | 0.01(0.01-0.02) | 0.00(0.00-0.00)    | 0.01(0.01-0.03) | -0.99(-1.85, -0.12) |
| Puerto Rico                      | 2.52(1.71-3.56)     | 0.25(0.17-0.36) | 0.92(0.62-1.35)    | 0.21(0.14-0.30) | 0.19(-0.51-0.90)    |
| Qatar                            | 0.04(0.02-0.07)     | 0.03(0.02-0.05) | 0.30(0.15-0.52)    | 0.06(0.03-0.10) | 3.80(2.94-4.67)     |
| Republic of Nauru                | 0.00(0.00-0.00)     | 0.01(0.00-0.02) | 0.00(0.00-0.00)    | 0.01(0.00-0.03) | 0.75(0.48-1.02)     |
| Republic of Niue                 | 0.00(0.00-0.00)     | 0.01(0.01-0.03) | 0.00(0.00-0.00)    | 0.07(0.04-0.15) | 2.75(1.66-3.85)     |
| Republic of Palau                | 0.00(0.00-0.00)     | 0.00(0.00-0.00) | 0.00(0.00-0.00)    | 0.00(0.00-0.00) | -0.93(-1.24, -0.61) |
| Republic of San Marino           | 0.01(0.01-0.01)     | 0.20(0.13-0.32) | 0.00(0.00-0.01)    | 0.09(0.04-0.17) | -2.35(-2.63, -2.07) |
| Romania                          | 24.96(13.13-44.22)  | 0.45(0.24-0.79) | 8.92(5.19-14.59)   | 0.30(0.17-0.48) | -1.06(-1.56, -0.55) |
| Russian Federation               | 95.18(65.18-133.17) | 0.27(0.19-0.38) | 41.99(30.40-53.58) | 0.16(0.12-0.21) | -1.83(-2.01, -1.64) |
| Rwanda                           | 11.27(5.82-20.33)   | 0.33(0.17-0.60) | 16.12(6.24-32.88)  | 0.32(0.13-0.66) | 0.15(-0.21-0.50)    |
| Saint Kitts and Nevis            | 0.03(0.02-0.05)     | 0.21(0.12-0.35) | 0.05(0.03-0.09)    | 0.53(0.29-0.87) | 3.05(2.66-3.45)     |
| Saint Lucia                      | 0.13(0.08-0.21)     | 0.26(0.15-0.41) | 0.12(0.07-0.20)    | 0.41(0.22-0.67) | 1.49(1.09-1.89)     |
| Saint Vincent and the Grenadines | 0.01(0.00-0.01)     | 0.02(0.01-0.02) | 0.10(0.06-0.15)    | 0.39(0.24-0.59) | 7.39(3.48-11.45)    |

|                       |                    |                 |                    |                 |                     |
|-----------------------|--------------------|-----------------|--------------------|-----------------|---------------------|
| Samoa                 | 0.07(0.03-0.15)    | 0.10(0.04-0.21) | 0.11(0.03-0.26)    | 0.14(0.04-0.32) | 1.17(0.94-1.40)     |
| Sao Tome and Principe | 0.03(0.01-0.05)    | 0.05(0.02-0.10) | 0.01(0.00-0.01)    | 0.01(0.00-0.02) | -6.68(-7.69, -5.67) |
| Saudi Arabia          | 12.26(2.33-22.26)  | 0.19(0.04-0.34) | 7.98(3.49-15.07)   | 0.11(0.05-0.20) | -1.48(-2.81, -0.13) |
| Senegal               | 1.65(0.60-3.33)    | 0.05(0.02-0.09) | 0.42(0.12-1.08)    | 0.01(0.00-0.02) | -6.70(-7.37, -6.04) |
| Serbia                | 13.22(6.82-22.91)  | 0.61(0.31-1.06) | 3.05(1.62-5.62)    | 0.23(0.12-0.42) | -3.70(-4.24, -3.16) |
| Seychelles            | 0.00(0.00-0.00)    | 0.00(0.00-0.00) | 0.00(0.00-0.00)    | 0.00(0.00-0.00) | 1.57(1.12-2.02)     |
| Sierra Leone          | 0.80(0.33-1.55)    | 0.04(0.02-0.09) | 0.23(0.10-0.62)    | 0.01(0.00-0.02) | -7.07(-7.97, -6.16) |
| Singapore             | 4.58(3.50-5.85)    | 0.71(0.54-0.90) | 4.60(3.27-6.45)    | 0.57(0.40-0.79) | -0.24(-0.66-0.18)   |
| Slovakia              | 3.02(1.74-4.92)    | 0.23(0.13-0.37) | 2.50(1.33-4.51)    | 0.29(0.15-0.53) | 0.72(0.37-1.06)     |
| Slovenia              | 0.98(0.72-1.29)    | 0.24(0.17-0.31) | 0.36(0.23-0.54)    | 0.12(0.07-0.17) | -1.69(-2.42, -0.94) |
| Solomon Islands       | 0.00(0.00-0.01)    | 0.00(0.00-0.01) | 0.01(0.00-0.02)    | 0.00(0.00-0.01) | 0.95(0.48-1.43)     |
| Somalia               | 3.22(1.33-8.64)    | 0.08(0.03-0.22) | 4.63(1.34-13.45)   | 0.04(0.01-0.13) | -1.41(-1.75, -1.07) |
| South Africa          | 20.40(11.73-32.69) | 0.15(0.09-0.24) | 26.86(17.10-40.34) | 0.18(0.11-0.27) | 1.01(0.46-1.56)     |

|                            |                    |                 |                      |                 |                     |
|----------------------------|--------------------|-----------------|----------------------|-----------------|---------------------|
| South Korea                | 61.26(37.03-94.35) | 0.54(0.33-0.83) | 23.56(14.54-35.10)   | 0.39(0.24-0.58) | -1.71(-2.16, -1.26) |
| South Sudan                | 5.94(2.35-13.92)   | 0.23(0.09-0.53) | 8.98(3.83-17.98)     | 0.21(0.09-0.42) | 0.38(-0.03-0.80)    |
| Spain                      | 54.98(43.83-67.59) | 0.70(0.56-0.86) | 39.33(29.83-50.55)   | 0.61(0.46-0.78) | -0.50(-0.79, -0.21) |
| Sri Lanka                  | 9.18(5.54-14.49)   | 0.17(0.10-0.26) | 10.42(5.81-17.38)    | 0.20(0.11-0.34) | 0.73(0.20-1.26)     |
| Sudan                      | 1.24(0.21-5.96)    | 0.01(0.00-0.07) | 5.82(2.27-19.66)     | 0.04(0.01-0.12) | 4.10(3.74-4.47)     |
| Suriname                   | 0.20(0.10-0.32)    | 0.15(0.08-0.25) | 0.36(0.20-0.58)      | 0.25(0.14-0.40) | 2.17(1.87-2.47)     |
| Swaziland                  | 0.31(0.15-0.56)    | 0.08(0.04-0.15) | 0.51(0.26-1.02)      | 0.12(0.06-0.25) | 1.58(0.98-2.19)     |
| Sweden                     | 10.88(8.13-14.24)  | 0.70(0.53-0.92) | 8.14(5.56-11.50)     | 0.45(0.31-0.63) | -1.95(-2.52, -1.36) |
| Switzerland                | 6.43(5.15-8.09)    | 0.56(0.45-0.70) | 10.97(7.74-15.68)    | 0.82(0.58-1.18) | 0.44(-0.09-0.97)    |
| Syria                      | 2.69(1.22-5.30)    | 0.05(0.02-0.09) | 1.98(1.12-3.15)      | 0.05(0.03-0.09) | 1.15(0.53-1.78)     |
| Taiwan (Province of China) | 9.09(7.15-11.16)   | 0.17(0.13-0.20) | 6.73(5.01-8.92)      | 0.23(0.17-0.30) | 0.88(0.28-1.47)     |
| Tajikistan                 | 0.05(0.03-0.10)    | 0.00(0.00-0.00) | 0.09(0.05-0.16)      | 0.00(0.00-0.00) | 0.49(-0.21-1.18)    |
| Tanzania                   | 41.69(21.38-76.51) | 0.35(0.18-0.63) | 119.19(50.87-238.01) | 0.49(0.21-0.98) | 1.70(1.32-2.08)     |



|                     |                     |                 |                      |                 |                     |
|---------------------|---------------------|-----------------|----------------------|-----------------|---------------------|
| Thailand            | 38.26(23.80-59.00)  | 0.23(0.14-0.35) | 28.44(19.40-40.67)   | 0.29(0.20-0.42) | 0.50(0.23-0.77)     |
| The Bahamas         | 0.34(0.22-0.52)     | 0.42(0.27-0.64) | 0.33(0.20-0.55)      | 0.41(0.25-0.67) | -0.02(-0.37-0.33)   |
| The Gambia          | 0.63(0.17-1.29)     | 0.14(0.04-0.28) | 1.45(0.40-3.32)      | 0.15(0.04-0.33) | -0.06(-0.34-0.23)   |
| Timor-Leste         | 0.19(0.07-0.45)     | 0.06(0.02-0.13) | 0.35(0.18-0.63)      | 0.07(0.04-0.12) | 0.36(0.00-0.72)     |
| Togo                | 0.67(0.27-1.40)     | 0.04(0.02-0.08) | 0.19(0.07-0.47)      | 0.01(0.00-0.01) | -7.09(-7.93, -6.23) |
| Tokelau             | 0.00(0.00-0.00)     | 0.01(0.00-0.02) | 0.00(0.00-0.00)      | 0.10(0.02-0.28) | 3.40(1.17-5.68)     |
| Tonga               | 0.00(0.00-0.00)     | 0.00(0.00-0.01) | 0.00(0.00-0.01)      | 0.01(0.00-0.02) | 1.30(0.83-1.77)     |
| Trinidad and Tobago | 3.12(2.09-4.50)     | 0.77(0.52-1.11) | 2.93(1.89-4.35)      | 1.08(0.69-1.60) | 2.04(1.52-2.57)     |
| Tunisia             | 15.50(9.26-24.50)   | 0.50(0.30-0.79) | 12.18(6.93-21.35)    | 0.44(0.25-0.77) | 0.27(-0.04-0.59)    |
| Turkey              | 93.00(48.60-157.15) | 0.45(0.24-0.77) | 126.42(77.76-195.58) | 0.68(0.42-1.06) | 1.90(1.45-2.36)     |
| Turkmenistan        | 0.69(0.33-1.44)     | 0.05(0.02-0.10) | 1.07(0.59-1.85)      | 0.07(0.04-0.12) | 2.11(1.75-2.47)     |
| Tuvalu              | 0.00(0.00-0.00)     | 0.01(0.00-0.01) | 0.00(0.00-0.00)      | 0.01(0.00-0.01) | 0.20(-0.10-0.51)    |
| Uganda              | 22.56(10.17-43.55)  | 0.27(0.12-0.52) | 89.31(35.81-186.31)  | 0.45(0.18-0.94) | 1.90(1.56-2.25)     |

|                      |                       |                 |                       |                 |                     |
|----------------------|-----------------------|-----------------|-----------------------|-----------------|---------------------|
| Ukraine              | 33.14(20.48-53.17)    | 0.29(0.18-0.47) | 20.09(12.09-33.44)    | 0.32(0.19-0.53) | 1.17(0.49-1.84)     |
| United Arab Emirates | 0.65(0.32-1.33)       | 0.11(0.05-0.23) | 1.77(1.03-2.75)       | 0.13(0.08-0.21) | 1.26(0.76-1.76)     |
| United Kingdom       | 127.67(106.77-148.83) | 1.17(0.98-1.36) | 65.30(54.27-77.28)    | 0.55(0.46-0.66) | -1.71(-2.28, -1.14) |
| United States        | 425.83(353.66-503.34) | 0.76(0.63-0.90) | 301.63(245.84-359.60) | 0.51(0.41-0.61) | -1.06(-1.29, -0.83) |
| Uruguay              | 3.22(2.33-4.56)       | 0.39(0.28-0.56) | 2.70(1.79-3.88)       | 0.41(0.27-0.59) | 0.05(-0.39-0.48)    |
| Uzbekistan           | 5.06(2.68-9.38)       | 0.06(0.03-0.11) | 12.64(6.89-20.50)     | 0.13(0.07-0.20) | 3.22(2.79-3.65)     |
| Vanuatu              | 0.00(0.00-0.00)       | 0.00(0.00-0.01) | 0.00(0.00-0.01)       | 0.00(0.00-0.01) | 1.28(0.82-1.74)     |
| Venezuela            | 24.10(16.53-33.37)    | 0.34(0.23-0.47) | 19.77(12.66-29.65)    | 0.30(0.19-0.45) | -0.37(-0.84-0.11)   |
| Vietnam              | 48.28(24.83-80.54)    | 0.18(0.09-0.30) | 61.50(35.86-101.20)   | 0.25(0.14-0.41) | 0.68(0.48-0.88)     |
| Virgin Islands, U.S. | 0.07(0.04-0.12)       | 0.23(0.13-0.38) | 0.03(0.01-0.06)       | 0.23(0.10-0.48) | 1.06(0.60-1.53)     |
| Yemen                | 0.41(0.08-2.06)       | 0.01(0.00-0.03) | 2.27(0.75-7.81)       | 0.02(0.01-0.06) | 4.78(4.07-5.50)     |
| Zambia               | 16.30(8.04-29.49)     | 0.43(0.21-0.79) | 40.76(19.17-74.58)    | 0.49(0.23-0.90) | 0.68(0.27-1.09)     |
| Zimbabwe             | 5.54(2.56-9.68)       | 0.12(0.05-0.20) | 10.80(5.17-18.61)     | 0.17(0.08-0.30) | 1.43(0.91-1.96)     |

---

Abbreviations: EAPC, estimated annual percentage change; UI, uncertainty interval.

<sup>a</sup> EAPC is expressed as 95% confidence interval.

**Table S4. Mortality of neuroblastoma in children, by countries and territories, 1990-2021.**

| location            | Rate per 100 000 (95%UI) |                 |                    |                 | 1990-2021<br>EAPC <sup>a</sup> |
|---------------------|--------------------------|-----------------|--------------------|-----------------|--------------------------------|
|                     | 1990                     |                 | 2021               |                 |                                |
|                     | Number of deaths         | Mortality rate  | Number of deaths   | Mortality rate  |                                |
| Afghanistan         | 0.11(0.02-0.59)          | 0.00(0.00-0.01) | 0.85(0.30-3.02)    | 0.01(0.00-0.02) | 3.26(2.83-3.69)                |
| Albania             | 0.50(0.32-0.71)          | 0.04(0.03-0.06) | 0.24(0.10-0.42)    | 0.05(0.02-0.10) | 0.56(0.25-0.86)                |
| Algeria             | 12.86(7.59-21.02)        | 0.12(0.07-0.20) | 11.59(7.23-18.79)  | 0.09(0.05-0.14) | -0.57(-0.80, -0.33)            |
| American Samoa      | 0.00(0.00-0.00)          | 0.00(0.00-0.00) | 0.00(0.00-0.00)    | 0.00(0.00-0.00) | -0.74(-1.58-0.11)              |
| Andorra             | 0.02(0.01-0.04)          | 0.24(0.14-0.40) | 0.01(0.01-0.01)    | 0.09(0.05-0.14) | -2.57(-2.94, -2.20)            |
| Angola              | 1.54(0.46-4.03)          | 0.03(0.01-0.09) | 4.57(2.62-8.05)    | 0.03(0.02-0.05) | 0.02(-0.16-0.20)               |
| Antigua and Barbuda | 0.02(0.01-0.03)          | 0.10(0.05-0.17) | 0.02(0.01-0.03)    | 0.13(0.09-0.21) | 1.20(0.77-1.64)                |
| Argentina           | 14.01(10.64-18.70)       | 0.14(0.10-0.18) | 14.51(10.15-20.23) | 0.14(0.10-0.20) | 0.59(0.18-1.00)                |
| Armenia             | 0.17(0.08-0.32)          | 0.02(0.01-0.03) | 0.20(0.10-0.34)    | 0.03(0.02-0.06) | 4.29(3.60-4.99)                |

|            |                    |                 |                    |                 |                     |
|------------|--------------------|-----------------|--------------------|-----------------|---------------------|
| Australia  | 6.30(5.31-7.48)    | 0.17(0.14-0.20) | 6.75(4.92-9.22)    | 0.14(0.10-0.19) | -0.49(-0.75, -0.23) |
| Austria    | 2.53(2.18-2.98)    | 0.19(0.16-0.22) | 1.29(0.89-1.78)    | 0.10(0.07-0.14) | -1.65(-1.83, -1.46) |
| Azerbaijan | 0.56(0.30-0.96)    | 0.02(0.01-0.04) | 0.46(0.26-0.77)    | 0.02(0.01-0.03) | 0.47(-0.00-0.94)    |
| Bahrain    | 0.05(0.03-0.09)    | 0.03(0.02-0.05) | 0.19(0.11-0.30)    | 0.06(0.04-0.10) | 4.45(3.62-5.29)     |
| Bangladesh | 33.29(18.08-53.93) | 0.07(0.04-0.11) | 33.50(20.18-52.05) | 0.07(0.04-0.11) | 0.25(-0.02-0.52)    |
| Barbados   | 0.21(0.15-0.29)    | 0.34(0.25-0.46) | 0.14(0.09-0.21)    | 0.30(0.20-0.45) | -0.13(-0.33-0.07)   |
| Belarus    | 2.92(1.97-4.19)    | 0.12(0.08-0.17) | 1.07(0.70-1.66)    | 0.07(0.04-0.11) | -1.42(-1.85, -1.00) |
| Belgium    | 3.41(2.68-4.27)    | 0.19(0.15-0.24) | 2.52(1.75-3.48)    | 0.13(0.09-0.18) | -1.48(-1.66, -1.29) |
| Belize     | 0.16(0.12-0.23)    | 0.20(0.15-0.28) | 0.23(0.16-0.32)    | 0.19(0.13-0.26) | 0.08(-0.81-0.98)    |
| Benin      | 0.46(0.21-0.83)    | 0.02(0.01-0.03) | 0.20(0.09-0.48)    | 0.00(0.00-0.01) | -6.42(-7.07, -5.75) |
| Bermuda    | 0.01(0.00-0.01)    | 0.05(0.03-0.08) | 0.01(0.00-0.01)    | 0.08(0.05-0.11) | 2.34(1.37-3.32)     |
| Bhutan     | 0.13(0.05-0.28)    | 0.05(0.02-0.11) | 0.14(0.06-0.26)    | 0.08(0.03-0.14) | 1.61(1.34-1.87)     |
| Bolivia    | 3.66(2.11-5.99)    | 0.14(0.08-0.22) | 3.98(2.48-6.02)    | 0.11(0.07-0.17) | -0.58(-0.70, -0.46) |

|                          |                     |                 |                     |                 |                     |
|--------------------------|---------------------|-----------------|---------------------|-----------------|---------------------|
| Bosnia and Herzegovina   | 0.45(0.27-0.75)     | 0.04(0.02-0.07) | 0.22(0.14-0.33)     | 0.04(0.03-0.07) | 1.26(0.83-1.70)     |
| Botswana                 | 0.18(0.11-0.31)     | 0.03(0.02-0.05) | 0.51(0.26-1.02)     | 0.07(0.04-0.15) | 3.47(3.06-3.88)     |
| Brazil                   | 96.46(82.56-110.09) | 0.19(0.16-0.21) | 83.60(63.77-103.45) | 0.17(0.13-0.21) | 0.24(-0.26-0.74)    |
| Brunei                   | 0.14(0.09-0.24)     | 0.16(0.10-0.26) | 0.12(0.08-0.18)     | 0.13(0.09-0.19) | -0.17(-0.51-0.16)   |
| Bulgaria                 | 1.26(0.69-2.05)     | 0.07(0.04-0.12) | 0.61(0.32-1.05)     | 0.06(0.03-0.11) | -1.05(-1.79, -0.31) |
| Burkina Faso             | 0.54(0.22-1.05)     | 0.01(0.00-0.02) | 0.23(0.10-0.59)     | 0.00(0.00-0.01) | -5.83(-6.52, -5.14) |
| Burundi                  | 2.76(1.58-5.00)     | 0.11(0.06-0.19) | 3.46(1.08-8.58)     | 0.06(0.02-0.15) | -0.74(-1.25, -0.23) |
| Cambodia                 | 1.30(0.65-2.15)     | 0.03(0.01-0.05) | 1.59(0.91-2.68)     | 0.03(0.02-0.05) | 0.38(0.17-0.60)     |
| Cameroon                 | 1.11(0.50-2.02)     | 0.02(0.01-0.04) | 0.54(0.27-1.50)     | 0.00(0.00-0.01) | -6.13(-6.74, -5.51) |
| Canada                   | 12.29(9.94-15.22)   | 0.21(0.17-0.26) | 8.64(5.95-13.32)    | 0.14(0.10-0.22) | -1.22(-1.50, -0.94) |
| Cape Verde               | 0.00(0.00-0.00)     | 0.00(0.00-0.00) | 0.00(0.00-0.00)     | 0.00(0.00-0.00) | 3.39(3.12-3.65)     |
| Central African Republic | 0.27(0.11-0.55)     | 0.02(0.01-0.04) | 0.41(0.19-0.79)     | 0.02(0.01-0.03) | -0.44(-0.63, -0.26) |
| Chad                     | 0.27(0.12-0.51)     | 0.01(0.00-0.02) | 0.17(0.07-0.50)     | 0.00(0.00-0.01) | -5.78(-6.45, -5.10) |

|                                  |                       |                 |                       |                 |                     |
|----------------------------------|-----------------------|-----------------|-----------------------|-----------------|---------------------|
| Chile                            | 1.67(1.35-2.06)       | 0.04(0.03-0.05) | 3.17(2.36-4.21)       | 0.09(0.06-0.12) | 2.52(1.37-3.68)     |
| China                            | 189.99(137.75-253.36) | 0.06(0.04-0.08) | 162.72(116.13-213.02) | 0.06(0.04-0.08) | 1.07(0.62-1.51)     |
| Colombia                         | 12.58(9.60-15.99)     | 0.11(0.08-0.14) | 11.81(7.99-16.57)     | 0.11(0.08-0.16) | 0.72(0.01-1.44)     |
| Comoros                          | 0.28(0.14-0.50)       | 0.13(0.07-0.24) | 0.43(0.21-0.81)       | 0.18(0.09-0.34) | 0.87(0.60-1.14)     |
| Congo                            | 0.47(0.20-0.90)       | 0.04(0.02-0.09) | 0.71(0.40-1.21)       | 0.04(0.02-0.06) | -0.44(-0.65, -0.23) |
| Cook Islands                     | 0.00(0.00-0.00)       | 0.00(0.00-0.01) | 0.00(0.00-0.00)       | 0.01(0.00-0.02) | 0.08(-0.87-1.04)    |
| Costa Rica                       | 1.55(1.17-2.01)       | 0.14(0.10-0.18) | 0.83(0.59-1.15)       | 0.08(0.06-0.11) | -1.38(-1.60, -1.15) |
| Cote d'Ivoire                    | 2.01(0.45-3.80)       | 0.04(0.01-0.07) | 4.37(1.10-9.24)       | 0.04(0.01-0.08) | 0.06(-0.31-0.43)    |
| Croatia                          | 1.38(1.06-1.74)       | 0.14(0.11-0.18) | 0.88(0.60-1.24)       | 0.15(0.10-0.21) | 0.14(-0.15-0.44)    |
| Cuba                             | 3.74(2.80-5.01)       | 0.15(0.11-0.20) | 2.33(1.66-3.20)       | 0.13(0.09-0.18) | 0.74(0.20-1.29)     |
| Cyprus                           | 0.24(0.16-0.39)       | 0.12(0.08-0.20) | 0.26(0.17-0.40)       | 0.12(0.08-0.18) | 0.90(0.38-1.42)     |
| Czech Republic                   | 2.32(1.78-3.09)       | 0.11(0.08-0.14) | 1.43(0.92-2.18)       | 0.08(0.05-0.13) | -1.10(-1.54, -0.66) |
| Democratic Republic of the Congo | 4.62(1.86-8.96)       | 0.03(0.01-0.05) | 5.27(3.05-8.75)       | 0.01(0.01-0.02) | -1.53(-2.12, -0.94) |

|                                |                   |                 |                     |                 |                     |
|--------------------------------|-------------------|-----------------|---------------------|-----------------|---------------------|
| Denmark                        | 0.68(0.50-0.89)   | 0.08(0.06-0.10) | 1.47(0.99-2.14)     | 0.15(0.10-0.22) | 1.35(0.85-1.85)     |
| Djibouti                       | 0.32(0.15-0.57)   | 0.19(0.08-0.33) | 0.69(0.29-1.30)     | 0.17(0.07-0.32) | 0.00(-0.31-0.32)    |
| Dominica                       | 0.02(0.01-0.04)   | 0.09(0.06-0.15) | 0.04(0.02-0.07)     | 0.28(0.14-0.53) | 3.51(3.11-3.91)     |
| Dominican Republic             | 2.15(1.26-4.88)   | 0.08(0.05-0.18) | 5.95(3.60-9.25)     | 0.20(0.12-0.31) | 1.64(0.83-2.46)     |
| Ecuador                        | 2.58(1.91-3.47)   | 0.07(0.05-0.09) | 3.80(2.59-5.71)     | 0.08(0.05-0.11) | 0.89(0.30-1.49)     |
| Egypt                          | 9.62(4.12-22.32)  | 0.04(0.02-0.10) | 13.40(8.06-26.62)   | 0.04(0.02-0.07) | -0.09(-0.80-0.63)   |
| El Salvador                    | 1.14(0.77-1.61)   | 0.05(0.04-0.07) | 0.69(0.47-0.99)     | 0.04(0.03-0.05) | -1.22(-1.44, -1.01) |
| Equatorial Guinea              | 0.05(0.02-0.10)   | 0.02(0.01-0.05) | 0.28(0.13-0.52)     | 0.05(0.02-0.09) | 2.15(1.76-2.53)     |
| Eritrea                        | 1.40(0.78-2.32)   | 0.09(0.05-0.15) | 3.70(1.65-7.04)     | 0.15(0.07-0.28) | 1.55(1.25-1.86)     |
| Estonia                        | 0.42(0.28-0.65)   | 0.12(0.08-0.19) | 0.14(0.08-0.23)     | 0.06(0.04-0.11) | -1.47(-1.78, -1.17) |
| Ethiopia                       | 17.90(7.29-59.22) | 0.07(0.03-0.24) | 42.77(18.05-120.06) | 0.10(0.04-0.27) | 0.94(0.35-1.53)     |
| Federated States of Micronesia | 0.00(0.00-0.00)   | 0.00(0.00-0.01) | 0.00(0.00-0.00)     | 0.00(0.00-0.00) | -0.65(-0.83, -0.48) |
| Fiji                           | 0.05(0.02-0.11)   | 0.02(0.01-0.04) | 0.05(0.02-0.11)     | 0.02(0.01-0.04) | -1.92(-3.19, -0.63) |



|           |                          |                 |                          |                 |                     |
|-----------|--------------------------|-----------------|--------------------------|-----------------|---------------------|
| Finland   | 0.55(0.43-0.70)          | 0.06(0.04-0.07) | 1.64(1.19-2.27)          | 0.19(0.14-0.27) | 3.58(2.76-4.41)     |
| France    | 20.41(17.52-23.23)       | 0.17(0.15-0.20) | 13.75(10.10-18.86)       | 0.12(0.09-0.16) | -1.23(-1.45, -1.01) |
| Gabon     | 0.17(0.09-0.33)          | 0.04(0.02-0.08) | 0.31(0.18-0.51)          | 0.05(0.03-0.08) | 0.95(0.72-1.17)     |
| Georgia   | 0.05(0.03-0.08)          | 0.00(0.00-0.01) | 0.30(0.18-0.47)          | 0.04(0.02-0.06) | 12.57(11.03-14.13)  |
| Germany   | 19.05(15.16-23.99)       | 0.15(0.12-0.19) | 20.02(14.65-27.00)       | 0.17(0.12-0.23) | 0.22(-0.10-0.54)    |
| Ghana     | 0.08(0.04-0.14)          | 0.00(0.00-0.00) | 0.07(0.02-0.22)          | 0.00(0.00-0.00) | -3.98(-5.17, -2.77) |
| Global    | 1642.64(1373.57-1956.38) | 0.09(0.08-0.11) | 1976.92(1445.04-2528.54) | 0.10(0.07-0.13) | 0.44(0.32-0.57)     |
| Greece    | 1.43(1.24-1.63)          | 0.07(0.06-0.08) | 0.87(0.68-1.08)          | 0.06(0.05-0.08) | 0.26(-0.07-0.59)    |
| Greenland | 0.02(0.01-0.03)          | 0.16(0.10-0.23) | 0.00(0.00-0.01)          | 0.03(0.01-0.06) | -5.84(-6.20, -5.48) |
| Grenada   | 0.03(0.02-0.04)          | 0.08(0.05-0.13) | 0.02(0.02-0.04)          | 0.11(0.07-0.17) | 1.64(1.21-2.07)     |
| Guam      | 0.00(0.00-0.00)          | 0.00(0.00-0.00) | 0.00(0.00-0.00)          | 0.00(0.00-0.00) | 2.83(1.47-4.21)     |
| Guatemala | 1.88(1.15-3.13)          | 0.05(0.03-0.08) | 1.51(1.04-2.14)          | 0.03(0.02-0.04) | -1.48(-1.74, -1.21) |
| Guinea    | 2.91(0.76-5.14)          | 0.11(0.03-0.19) | 5.26(1.27-11.40)         | 0.09(0.02-0.19) | -0.39(-0.62, -0.15) |

|               |                       |                 |                       |                 |                     |
|---------------|-----------------------|-----------------|-----------------------|-----------------|---------------------|
| Guinea-Bissau | 0.09(0.04-0.15)       | 0.02(0.01-0.03) | 0.02(0.01-0.05)       | 0.00(0.00-0.01) | -7.32(-7.72, -6.91) |
| Guyana        | 0.03(0.02-0.05)       | 0.01(0.01-0.02) | 0.40(0.25-0.61)       | 0.19(0.12-0.29) | 7.98(5.53-10.48)    |
| Haiti         | 3.88(1.17-7.88)       | 0.14(0.04-0.29) | 7.84(3.27-14.73)      | 0.18(0.08-0.34) | 1.29(1.12-1.46)     |
| Honduras      | 1.54(0.96-2.38)       | 0.07(0.04-0.11) | 1.92(1.10-3.15)       | 0.06(0.03-0.10) | -0.67(-0.85, -0.49) |
| Hungary       | 2.50(1.99-3.08)       | 0.12(0.09-0.14) | 1.31(0.89-1.87)       | 0.09(0.06-0.13) | -0.59(-1.26-0.09)   |
| Iceland       | 0.08(0.07-0.11)       | 0.13(0.10-0.17) | 0.10(0.06-0.15)       | 0.14(0.09-0.23) | 1.17(0.48-1.87)     |
| India         | 228.45(140.24-315.75) | 0.07(0.04-0.10) | 263.49(176.86-360.16) | 0.07(0.05-0.10) | 0.04(-0.30-0.39)    |
| Indonesia     | 28.37(15.96-48.98)    | 0.04(0.02-0.07) | 38.86(26.71-59.10)    | 0.06(0.04-0.09) | 0.91(0.78-1.04)     |
| Iran          | 1.67(0.93-3.00)       | 0.01(0.00-0.01) | 2.67(1.13-4.27)       | 0.01(0.01-0.02) | 4.83(3.89-5.77)     |
| Iraq          | 4.21(2.60-6.62)       | 0.05(0.03-0.08) | 10.55(6.44-17.00)     | 0.08(0.05-0.13) | 1.88(1.65-2.12)     |
| Ireland       | 1.72(1.41-2.13)       | 0.17(0.14-0.22) | 0.90(0.63-1.25)       | 0.09(0.06-0.13) | -1.36(-1.68, -1.04) |
| Israel        | 3.26(2.38-4.22)       | 0.21(0.16-0.28) | 3.28(2.34-4.50)       | 0.12(0.09-0.17) | -1.50(-1.87, -1.13) |
| Italy         | 27.96(25.33-30.56)    | 0.30(0.27-0.33) | 18.40(13.95-23.17)    | 0.24(0.18-0.30) | -0.77(-1.05, -0.49) |

|            |                    |                 |                    |                 |                     |
|------------|--------------------|-----------------|--------------------|-----------------|---------------------|
| Jamaica    | 1.31(0.99-1.75)    | 0.16(0.12-0.21) | 1.62(0.97-2.53)    | 0.28(0.17-0.43) | 2.00(1.20-2.81)     |
| Japan      | 52.35(49.87-54.77) | 0.23(0.22-0.24) | 30.27(26.80-33.73) | 0.20(0.17-0.22) | -0.73(-1.09, -0.37) |
| Jordan     | 1.71(1.11-2.62)    | 0.10(0.07-0.16) | 4.29(2.79-6.54)    | 0.12(0.08-0.18) | 0.50(0.24-0.76)     |
| Kazakhstan | 0.43(0.26-0.68)    | 0.01(0.01-0.01) | 0.64(0.37-1.03)    | 0.01(0.01-0.02) | 1.79(1.53-2.04)     |
| Kenya      | 4.77(2.86-8.44)    | 0.04(0.03-0.08) | 9.75(5.37-15.69)   | 0.05(0.03-0.08) | 1.20(0.91-1.50)     |
| Kiribati   | 0.00(0.00-0.00)    | 0.00(0.00-0.00) | 0.00(0.00-0.00)    | 0.00(0.00-0.00) | 0.43(0.22-0.65)     |
| Kuwait     | 0.49(0.36-0.67)    | 0.09(0.06-0.12) | 0.83(0.54-1.19)    | 0.10(0.06-0.14) | 3.99(1.87-6.16)     |
| Kyrgyzstan | 1.26(0.70-2.13)    | 0.08(0.04-0.13) | 0.32(0.22-0.47)    | 0.01(0.01-0.02) | 1.84(-1.23-5.02)    |
| Laos       | 0.45(0.17-0.89)    | 0.02(0.01-0.05) | 0.82(0.46-1.39)    | 0.04(0.02-0.06) | 1.53(1.39-1.66)     |
| Latvia     | 0.57(0.38-0.89)    | 0.10(0.07-0.16) | 0.08(0.05-0.14)    | 0.03(0.02-0.05) | -2.14(-2.93, -1.35) |
| Lebanon    | 0.65(0.41-0.98)    | 0.06(0.04-0.09) | 0.88(0.44-1.54)    | 0.07(0.03-0.12) | 0.89(0.65-1.14)     |
| Lesotho    | 0.13(0.08-0.22)    | 0.02(0.01-0.03) | 0.18(0.10-0.31)    | 0.03(0.02-0.05) | 1.78(1.33-2.23)     |
| Liberia    | 0.23(0.11-0.38)    | 0.02(0.01-0.03) | 0.04(0.01-0.09)    | 0.00(0.00-0.00) | -7.94(-8.94, -6.92) |

|                  |                    |                 |                    |                 |                     |
|------------------|--------------------|-----------------|--------------------|-----------------|---------------------|
| Libya            | 2.13(1.21-3.86)    | 0.12(0.07-0.21) | 2.72(1.48-4.61)    | 0.18(0.10-0.31) | 1.83(1.37-2.29)     |
| Lithuania        | 0.69(0.45-1.03)    | 0.08(0.05-0.12) | 0.22(0.14-0.33)    | 0.05(0.03-0.08) | -0.61(-1.04, -0.17) |
| Luxembourg       | 0.13(0.11-0.15)    | 0.19(0.16-0.23) | 0.09(0.07-0.12)    | 0.09(0.07-0.12) | -3.13(-3.53, -2.74) |
| Macedonia        | 0.53(0.37-0.75)    | 0.10(0.07-0.14) | 0.17(0.10-0.27)    | 0.05(0.03-0.08) | -0.81(-1.27, -0.35) |
| Madagascar       | 7.54(4.68-11.86)   | 0.14(0.09-0.22) | 12.33(5.92-21.98)  | 0.11(0.05-0.19) | -0.58(-0.96, -0.21) |
| Malawi           | 22.61(14.62-33.99) | 0.50(0.32-0.75) | 34.11(12.91-71.01) | 0.42(0.16-0.87) | -0.26(-0.49, -0.03) |
| Malaysia         | 4.73(2.65-7.16)    | 0.07(0.04-0.11) | 6.56(4.35-9.19)    | 0.09(0.06-0.12) | 0.81(0.34-1.28)     |
| Maldives         | 0.18(0.07-0.44)    | 0.17(0.07-0.42) | 0.25(0.16-0.39)    | 0.25(0.16-0.39) | 2.01(1.64-2.38)     |
| Mali             | 1.74(0.36-3.27)    | 0.04(0.01-0.08) | 4.03(0.91-9.06)    | 0.03(0.01-0.08) | -0.65(-0.87, -0.44) |
| Malta            | 0.30(0.22-0.41)    | 0.34(0.25-0.46) | 0.24(0.15-0.35)    | 0.37(0.24-0.55) | 0.16(-0.28-0.60)    |
| Marshall Islands | 0.00(0.00-0.00)    | 0.00(0.00-0.00) | 0.00(0.00-0.00)    | 0.00(0.00-0.01) | 1.50(1.09-1.91)     |
| Mauritania       | 0.19(0.09-0.34)    | 0.02(0.01-0.04) | 0.06(0.03-0.19)    | 0.00(0.00-0.01) | -6.94(-7.52, -6.37) |
| Mauritius        | 0.11(0.09-0.14)    | 0.03(0.03-0.04) | 0.15(0.11-0.19)    | 0.07(0.06-0.09) | 2.50(1.54-3.48)     |

|             |                    |                 |                    |                 |                     |
|-------------|--------------------|-----------------|--------------------|-----------------|---------------------|
| Mexico      | 41.38(37.14-46.74) | 0.12(0.11-0.14) | 28.87(22.15-38.66) | 0.09(0.07-0.12) | -0.93(-1.65, -0.21) |
| Moldova     | 0.56(0.41-0.84)    | 0.05(0.03-0.07) | 0.27(0.19-0.36)    | 0.05(0.04-0.07) | 1.61(1.15-2.08)     |
| Mongolia    | 0.21(0.09-0.41)    | 0.02(0.01-0.05) | 0.25(0.14-0.43)    | 0.02(0.01-0.04) | 0.79(0.32-1.26)     |
| Montenegro  | 0.16(0.10-0.24)    | 0.10(0.06-0.15) | 0.05(0.03-0.08)    | 0.04(0.03-0.07) | -1.43(-1.83, -1.02) |
| Morocco     | 13.54(8.27-20.25)  | 0.14(0.08-0.21) | 13.60(7.64-23.91)  | 0.14(0.08-0.24) | 0.54(0.29-0.79)     |
| Mozambique  | 7.98(4.46-15.03)   | 0.13(0.07-0.24) | 16.13(5.97-36.71)  | 0.11(0.04-0.26) | -0.21(-0.49-0.07)   |
| Myanmar     | 5.45(2.23-10.28)   | 0.04(0.02-0.07) | 8.59(5.27-13.49)   | 0.05(0.03-0.09) | 1.48(1.39-1.57)     |
| Namibia     | 0.50(0.25-0.79)    | 0.08(0.04-0.13) | 1.32(0.67-2.17)    | 0.16(0.08-0.26) | 2.66(2.28-3.03)     |
| Nepal       | 4.13(2.34-7.47)    | 0.05(0.03-0.09) | 4.31(2.02-7.61)    | 0.05(0.02-0.08) | 0.03(-0.11-0.17)    |
| Netherlands | 6.93(5.67-8.62)    | 0.25(0.21-0.32) | 3.72(2.62-5.16)    | 0.14(0.10-0.19) | -2.46(-2.81, -2.09) |
| New Zealand | 1.42(1.14-1.78)    | 0.18(0.14-0.22) | 0.94(0.73-1.19)    | 0.10(0.07-0.12) | -1.17(-1.83, -0.51) |
| Nicaragua   | 3.62(2.35-5.48)    | 0.20(0.13-0.30) | 1.80(1.17-2.71)    | 0.09(0.06-0.14) | -2.09(-2.40, -1.77) |
| Niger       | 0.48(0.21-0.99)    | 0.01(0.01-0.02) | 0.13(0.05-0.33)    | 0.00(0.00-0.00) | -8.71(-9.46, -7.97) |

|                          |                     |                 |                       |                 |                     |
|--------------------------|---------------------|-----------------|-----------------------|-----------------|---------------------|
| Nigeria                  | 64.63(17.68-103.03) | 0.17(0.05-0.26) | 248.66(57.27-441.58)  | 0.24(0.06-0.43) | 1.69(1.30-2.07)     |
| North Korea              | 3.66(2.17-6.00)     | 0.06(0.04-0.10) | 1.52(0.68-3.02)       | 0.03(0.01-0.06) | -1.69(-1.96, -1.42) |
| Northern Mariana Islands | 0.00(0.00-0.00)     | 0.00(0.00-0.00) | 0.00(0.00-0.00)       | 0.00(0.00-0.00) | 3.08(1.99-4.18)     |
| Norway                   | 0.95(0.86-1.02)     | 0.12(0.11-0.13) | 0.48(0.39-0.59)       | 0.05(0.04-0.06) | -3.41(-3.86, -2.96) |
| Oman                     | 0.42(0.12-0.86)     | 0.05(0.01-0.10) | 0.60(0.36-0.87)       | 0.05(0.03-0.07) | 0.53(-0.12-1.19)    |
| Pakistan                 | 83.42(52.23-132.13) | 0.17(0.11-0.27) | 268.53(165.09-426.35) | 0.31(0.19-0.50) | 2.97(2.58-3.37)     |
| Palestine                | 0.74(0.42-1.36)     | 0.08(0.04-0.14) | 1.96(1.20-2.96)       | 0.11(0.06-0.16) | 2.24(1.67-2.81)     |
| Panama                   | 1.16(0.90-1.46)     | 0.14(0.11-0.17) | 1.42(1.06-1.89)       | 0.12(0.09-0.16) | -0.77(-1.01, -0.52) |
| Papua New Guinea         | 0.03(0.01-0.05)     | 0.00(0.00-0.00) | 0.07(0.03-0.14)       | 0.00(0.00-0.00) | 0.58(0.30-0.86)     |
| Paraguay                 | 1.79(1.08-2.74)     | 0.11(0.06-0.16) | 2.56(1.51-4.24)       | 0.13(0.08-0.21) | 0.98(0.68-1.28)     |
| Peru                     | 11.25(7.15-15.83)   | 0.14(0.09-0.19) | 5.83(3.71-8.89)       | 0.06(0.04-0.09) | -2.04(-2.23, -1.85) |
| Philippines              | 20.66(13.98-30.23)  | 0.08(0.06-0.12) | 29.25(21.37-37.43)    | 0.09(0.06-0.11) | 0.67(0.48-0.86)     |
| Poland                   | 8.90(8.12-9.76)     | 0.09(0.08-0.10) | 4.15(3.38-5.01)       | 0.07(0.06-0.09) | -0.78(-1.80-0.25)   |

|                        |                    |                 |                    |                 |                     |
|------------------------|--------------------|-----------------|--------------------|-----------------|---------------------|
| Portugal               | 6.60(5.35-7.94)    | 0.31(0.25-0.38) | 2.00(1.46-2.80)    | 0.15(0.11-0.21) | -2.85(-3.11, -2.60) |
| Principality of Monaco | 0.00(0.00-0.00)    | 0.00(0.00-0.00) | 0.00(0.00-0.00)    | 0.00(0.00-0.01) | -0.94(-1.78, -0.11) |
| Puerto Rico            | 0.89(0.68-1.20)    | 0.09(0.07-0.12) | 0.28(0.20-0.40)    | 0.06(0.05-0.09) | -0.18(-0.78-0.42)   |
| Qatar                  | 0.01(0.01-0.02)    | 0.01(0.01-0.02) | 0.08(0.04-0.13)    | 0.02(0.01-0.03) | 2.91(2.01-3.81)     |
| Republic of Nauru      | 0.00(0.00-0.00)    | 0.00(0.00-0.01) | 0.00(0.00-0.00)    | 0.00(0.00-0.01) | 0.23(0.09-0.38)     |
| Republic of Niue       | 0.00(0.00-0.00)    | 0.01(0.00-0.01) | 0.00(0.00-0.00)    | 0.03(0.01-0.05) | 2.17(1.08-3.28)     |
| Republic of Palau      | 0.00(0.00-0.00)    | 0.00(0.00-0.00) | 0.00(0.00-0.00)    | 0.00(0.00-0.00) | -1.08(-1.33, -0.84) |
| Republic of San Marino | 0.00(0.00-0.00)    | 0.05(0.03-0.08) | 0.00(0.00-0.00)    | 0.02(0.01-0.05) | -2.29(-2.56, -2.02) |
| Romania                | 8.92(5.14-15.06)   | 0.16(0.09-0.27) | 2.79(1.68-4.50)    | 0.09(0.06-0.15) | -1.66(-2.04, -1.28) |
| Russian Federation     | 33.87(26.41-44.12) | 0.10(0.08-0.13) | 13.25(10.45-15.54) | 0.05(0.04-0.06) | -2.44(-2.71, -2.17) |
| Rwanda                 | 5.24(3.08-8.58)    | 0.15(0.09-0.25) | 6.54(2.81-11.98)   | 0.13(0.06-0.24) | -0.20(-0.50-0.11)   |
| Saint Kitts and Nevis  | 0.01(0.01-0.02)    | 0.09(0.06-0.13) | 0.02(0.01-0.03)    | 0.19(0.11-0.30) | 2.48(2.21-2.75)     |
| Saint Lucia            | 0.05(0.04-0.08)    | 0.11(0.07-0.16) | 0.04(0.03-0.07)    | 0.15(0.09-0.24) | 1.29(1.03-1.55)     |

|                                  |                 |                 |                 |                 |                     |
|----------------------------------|-----------------|-----------------|-----------------|-----------------|---------------------|
| Saint Vincent and the Grenadines | 0.00(0.00-0.00) | 0.01(0.00-0.01) | 0.04(0.02-0.05) | 0.14(0.10-0.21) | 6.89(3.09-10.83)    |
| Samoa                            | 0.03(0.01-0.06) | 0.04(0.02-0.08) | 0.04(0.01-0.08) | 0.05(0.02-0.10) | 0.49(0.35-0.63)     |
| Sao Tome and Principe            | 0.01(0.01-0.02) | 0.02(0.01-0.04) | 0.00(0.00-0.01) | 0.00(0.00-0.01) | -7.29(-8.33, -6.24) |
| Saudi Arabia                     | 5.02(0.95-8.84) | 0.08(0.01-0.13) | 2.52(1.04-4.81) | 0.03(0.01-0.06) | -2.28(-3.56, -0.98) |
| Senegal                          | 0.77(0.33-1.40) | 0.02(0.01-0.04) | 0.18(0.06-0.41) | 0.00(0.00-0.01) | -7.16(-7.79, -6.53) |
| Serbia                           | 4.73(2.66-7.73) | 0.22(0.12-0.36) | 0.97(0.53-1.77) | 0.07(0.04-0.13) | -4.10(-4.59, -3.60) |
| Seychelles                       | 0.00(0.00-0.00) | 0.00(0.00-0.00) | 0.00(0.00-0.00) | 0.00(0.00-0.00) | 1.37(0.96-1.78)     |
| Sierra Leone                     | 0.37(0.17-0.65) | 0.02(0.01-0.04) | 0.10(0.04-0.25) | 0.00(0.00-0.01) | -7.15(-7.97, -6.32) |
| Singapore                        | 1.42(1.15-1.71) | 0.22(0.18-0.26) | 1.24(0.90-1.67) | 0.15(0.11-0.21) | -0.93(-1.38, -0.48) |
| Slovakia                         | 1.09(0.68-1.69) | 0.08(0.05-0.13) | 0.77(0.42-1.39) | 0.09(0.05-0.16) | 0.60(0.29-0.91)     |
| Slovenia                         | 0.30(0.24-0.38) | 0.07(0.06-0.09) | 0.10(0.06-0.14) | 0.03(0.02-0.05) | -2.37(-3.04, -1.68) |
| Solomon Islands                  | 0.00(0.00-0.00) | 0.00(0.00-0.00) | 0.00(0.00-0.01) | 0.00(0.00-0.00) | 0.79(0.31-1.28)     |
| Somalia                          | 1.50(0.70-3.73) | 0.04(0.02-0.10) | 2.16(0.73-6.39) | 0.02(0.01-0.06) | -1.40(-1.74, -1.07) |



|                            |                    |                 |                   |                 |                     |
|----------------------------|--------------------|-----------------|-------------------|-----------------|---------------------|
| South Africa               | 8.30(5.39-11.99)   | 0.06(0.04-0.09) | 9.71(7.10-13.94)  | 0.06(0.05-0.09) | 0.55(0.11-0.99)     |
| South Korea                | 22.15(14.42-32.42) | 0.19(0.13-0.29) | 6.40(4.06-9.45)   | 0.11(0.07-0.16) | -2.67(-3.11, -2.23) |
| South Sudan                | 2.76(1.24-5.68)    | 0.11(0.05-0.22) | 4.19(2.17-7.63)   | 0.10(0.05-0.18) | 0.40(-0.02-0.82)    |
| Spain                      | 17.15(14.84-19.73) | 0.22(0.19-0.25) | 10.57(8.24-13.50) | 0.16(0.13-0.21) | -0.83(-1.02, -0.64) |
| Sri Lanka                  | 3.83(2.60-5.59)    | 0.07(0.05-0.10) | 3.28(1.94-5.38)   | 0.06(0.04-0.11) | 0.02(-0.54-0.58)    |
| Sudan                      | 0.58(0.11-2.63)    | 0.01(0.00-0.03) | 2.05(0.84-6.68)   | 0.01(0.01-0.04) | 3.11(2.70-3.53)     |
| Suriname                   | 0.08(0.05-0.12)    | 0.06(0.04-0.09) | 0.13(0.07-0.20)   | 0.09(0.05-0.14) | 1.67(1.33-2.01)     |
| Swaziland                  | 0.14(0.08-0.25)    | 0.04(0.02-0.06) | 0.21(0.12-0.38)   | 0.05(0.03-0.09) | 1.18(0.71-1.66)     |
| Sweden                     | 2.94(2.31-3.70)    | 0.19(0.15-0.24) | 2.20(1.53-3.09)   | 0.12(0.08-0.17) | -1.90(-2.49, -1.32) |
| Switzerland                | 1.70(1.39-2.08)    | 0.15(0.12-0.18) | 2.93(2.10-4.08)   | 0.22(0.16-0.31) | 0.45(-0.08-0.98)    |
| Syria                      | 1.11(0.58-2.15)    | 0.02(0.01-0.04) | 0.63(0.37-0.96)   | 0.02(0.01-0.03) | 0.42(-0.07-0.91)    |
| Taiwan (Province of China) | 2.85(2.46-3.29)    | 0.05(0.04-0.06) | 1.83(1.43-2.40)   | 0.06(0.05-0.08) | 0.22(-0.28-0.72)    |
| Tajikistan                 | 0.02(0.01-0.04)    | 0.00(0.00-0.00) | 0.03(0.02-0.05)   | 0.00(0.00-0.00) | 0.07(-0.50-0.64)    |

|                     |                    |                 |                    |                 |                     |
|---------------------|--------------------|-----------------|--------------------|-----------------|---------------------|
| Tanzania            | 19.39(11.94-32.36) | 0.16(0.10-0.27) | 48.17(22.21-85.27) | 0.20(0.09-0.35) | 1.29(0.99-1.60)     |
| Thailand            | 13.75(9.17-19.36)  | 0.08(0.05-0.11) | 8.85(6.37-12.17)   | 0.09(0.07-0.12) | -0.16(-0.50-0.17)   |
| The Bahamas         | 0.12(0.08-0.17)    | 0.15(0.10-0.21) | 0.12(0.08-0.19)    | 0.15(0.10-0.23) | 0.01(-0.33-0.36)    |
| The Gambia          | 0.30(0.08-0.55)    | 0.06(0.02-0.12) | 0.59(0.18-1.26)    | 0.06(0.02-0.13) | -0.63(-0.97, -0.28) |
| Timor-Leste         | 0.09(0.04-0.19)    | 0.03(0.01-0.06) | 0.15(0.09-0.24)    | 0.03(0.02-0.05) | -0.26(-0.59-0.06)   |
| Togo                | 0.31(0.14-0.61)    | 0.02(0.01-0.03) | 0.08(0.03-0.21)    | 0.00(0.00-0.01) | -7.36(-8.08, -6.63) |
| Tokelau             | 0.00(0.00-0.00)    | 0.00(0.00-0.01) | 0.00(0.00-0.00)    | 0.03(0.01-0.09) | 2.77(0.55-5.05)     |
| Tonga               | 0.00(0.00-0.00)    | 0.00(0.00-0.00) | 0.00(0.00-0.00)    | 0.00(0.00-0.01) | 0.64(0.24-1.05)     |
| Trinidad and Tobago | 1.28(1.01-1.61)    | 0.31(0.25-0.40) | 1.04(0.73-1.43)    | 0.38(0.27-0.53) | 1.51(1.13-1.90)     |
| Tunisia             | 5.47(3.42-8.65)    | 0.18(0.11-0.28) | 3.77(2.20-6.55)    | 0.14(0.08-0.24) | -0.38(-0.59, -0.17) |
| Turkey              | 38.10(22.18-60.98) | 0.19(0.11-0.30) | 39.14(24.64-57.91) | 0.21(0.13-0.31) | 0.94(0.61-1.28)     |
| Turkmenistan        | 0.29(0.16-0.54)    | 0.02(0.01-0.04) | 0.39(0.24-0.64)    | 0.03(0.02-0.04) | 1.47(1.13-1.82)     |
| Tuvalu              | 0.00(0.00-0.00)    | 0.00(0.00-0.01) | 0.00(0.00-0.00)    | 0.00(0.00-0.01) | -0.38(-0.60, -0.15) |

|                      |                       |                 |                    |                 |                     |
|----------------------|-----------------------|-----------------|--------------------|-----------------|---------------------|
| Uganda               | 10.46(5.50-18.08)     | 0.12(0.07-0.21) | 36.15(15.80-70.77) | 0.18(0.08-0.36) | 1.56(1.27-1.84)     |
| Ukraine              | 11.73(7.91-17.81)     | 0.10(0.07-0.16) | 6.29(3.84-9.68)    | 0.10(0.06-0.15) | 0.74(0.23-1.25)     |
| United Arab Emirates | 0.27(0.15-0.49)       | 0.05(0.03-0.08) | 0.55(0.35-0.83)    | 0.04(0.03-0.06) | 0.78(0.20-1.37)     |
| United Kingdom       | 37.88(36.16-39.83)    | 0.35(0.33-0.36) | 17.39(15.19-19.37) | 0.15(0.13-0.16) | -2.13(-2.65, -1.61) |
| United States        | 127.70(117.80-137.34) | 0.23(0.21-0.25) | 82.38(70.44-94.39) | 0.14(0.12-0.16) | -1.32(-1.50, -1.13) |
| Uruguay              | 1.17(0.89-1.56)       | 0.14(0.11-0.19) | 0.86(0.60-1.21)    | 0.13(0.09-0.18) | -0.45(-0.78, -0.12) |
| Uzbekistan           | 2.10(1.20-3.61)       | 0.02(0.01-0.04) | 4.57(2.71-7.17)    | 0.05(0.03-0.07) | 2.78(2.46-3.10)     |
| Vanuatu              | 0.00(0.00-0.00)       | 0.00(0.00-0.00) | 0.00(0.00-0.00)    | 0.00(0.00-0.00) | 1.03(0.56-1.51)     |
| Venezuela            | 9.94(8.27-12.05)      | 0.14(0.12-0.17) | 7.21(5.06-10.11)   | 0.11(0.08-0.15) | -0.46(-0.86, -0.07) |
| Vietnam              | 19.63(10.90-28.95)    | 0.07(0.04-0.11) | 18.85(11.08-29.80) | 0.08(0.04-0.12) | 0.07(-0.08-0.23)    |
| Virgin Islands, U.S. | 0.03(0.02-0.04)       | 0.08(0.05-0.13) | 0.01(0.00-0.02)    | 0.07(0.03-0.15) | 0.75(0.23-1.27)     |
| Yemen                | 0.19(0.04-0.96)       | 0.00(0.00-0.01) | 0.93(0.34-3.18)    | 0.01(0.00-0.02) | 4.20(3.59-4.81)     |
| Zambia               | 7.57(4.34-12.76)      | 0.20(0.12-0.34) | 16.61(8.77-29.03)  | 0.20(0.11-0.35) | 0.42(0.08-0.76)     |

Zimbabwe

2.25(1.10-3.69)

0.05(0.02-0.08)

5.10(2.83-8.03)

0.08(0.04-0.13)

2.14(1.68-2.60)

---

Abbreviations: EAPC, estimated annual percentage change; UI, uncertainty interval.

<sup>a</sup> EAPC is expressed as 95% confidence interval.

**Table S5. DALYs of neuroblastoma in children, by countries and territories, 1990-2021.**

| location            | Rate per 100 000 (95%UI) |                    |                         |                   |                     |
|---------------------|--------------------------|--------------------|-------------------------|-------------------|---------------------|
|                     | 1990                     |                    | 2021                    |                   | 1990-2021           |
|                     | Number of DALYs          | DALYs rate         | Number of DALYs         | DALYs rate        | EAPC <sup>a</sup>   |
| Afghanistan         | 9.90(1.57-52.34)         | 0.23(0.04-1.21)    | 73.94(26.57-264.26)     | 0.52(0.19-1.86)   | 3.22(2.79-3.65)     |
| Albania             | 44.09(28.04-62.43)       | 3.95(2.51-5.59)    | 21.53(8.95-37.91)       | 4.85(2.02-8.54)   | 0.56(0.27-0.85)     |
| Algeria             | 1140.99(664.13-1870.72)  | 10.64(6.19-17.44)  | 1027.13(637.75-1675.13) | 7.72(4.79-12.59)  | -0.56(-0.80, -0.32) |
| American Samoa      | 0.02(0.01-0.03)          | 0.08(0.05-0.14)    | 0.01(0.00-0.02)         | 0.07(0.03-0.13)   | -0.85(-1.69-0.00)   |
| Andorra             | 2.06(1.21-3.44)          | 21.71(12.69-36.25) | 0.82(0.48-1.27)         | 8.05(4.75-12.50)  | -2.62(-3.00, -2.24) |
| Angola              | 136.17(40.44-356.20)     | 2.89(0.86-7.55)    | 399.96(228.35-707.67)   | 2.62(1.50-4.64)   | -0.01(-0.19-0.18)   |
| Antigua and Barbuda | 1.61(0.86-2.66)          | 8.84(4.70-14.60)   | 2.01(1.29-3.09)         | 11.87(7.62-18.27) | 1.19(0.77-1.61)     |
| Argentina           | 1224.21(933.94-1633.22)  | 12.08(9.21-16.11)  | 1258.59(880.59-1746.00) | 12.36(8.65-17.15) | 0.57(0.17-0.98)     |
| Armenia             | 14.47(6.81-28.49)        | 1.39(0.65-2.73)    | 17.43(8.77-30.03)       | 2.94(1.48-5.07)   | 4.33(3.62-5.06)     |

|            |                          |                    |                          |                    |                     |
|------------|--------------------------|--------------------|--------------------------|--------------------|---------------------|
| Australia  | 558.16(469.87-662.30)    | 14.74(12.41-17.49) | 591.21(429.35-806.82)    | 12.45(9.04-16.99)  | -0.50(-0.76, -0.25) |
| Austria    | 223.70(193.21-264.18)    | 16.59(14.33-19.59) | 113.70(78.40-157.72)     | 8.77(6.04-12.16)   | -1.66(-1.84, -1.48) |
| Azerbaijan | 49.80(26.17-85.27)       | 2.05(1.08-3.51)    | 40.19(22.27-67.33)       | 1.70(0.94-2.85)    | 0.47(-0.02-0.96)    |
| Bahrain    | 4.26(2.36-7.75)          | 2.61(1.44-4.75)    | 16.38(9.29-26.05)        | 5.52(3.13-8.78)    | 4.44(3.60-5.29)     |
| Bangladesh | 2954.94(1592.47-4812.16) | 6.04(3.26-9.84)    | 2937.31(1768.94-4566.02) | 6.42(3.87-9.98)    | 0.22(-0.05-0.48)    |
| Barbados   | 18.68(13.41-25.23)       | 29.96(21.51-40.46) | 12.37(8.10-19.01)        | 26.28(17.20-40.36) | -0.14(-0.34-0.06)   |
| Belarus    | 258.82(174.61-370.46)    | 10.77(7.26-15.41)  | 93.55(60.88-144.65)      | 5.93(3.86-9.17)    | -1.45(-1.89, -1.01) |
| Belgium    | 299.61(237.41-376.19)    | 16.59(13.14-20.83) | 220.35(153.24-303.20)    | 11.52(8.01-15.86)  | -1.47(-1.66, -1.29) |
| Belize     | 14.50(10.49-19.93)       | 17.71(12.82-24.35) | 20.35(14.44-28.72)       | 16.53(11.73-23.33) | 0.08(-0.82-0.98)    |
| Benin      | 40.61(18.80-73.71)       | 1.68(0.78-3.04)    | 17.57(8.14-42.03)        | 0.29(0.13-0.69)    | -6.46(-7.12, -5.80) |
| Bermuda    | 0.51(0.33-0.81)          | 4.25(2.77-6.77)    | 0.59(0.40-0.86)          | 7.03(4.74-10.22)   | 2.37(1.40-3.35)     |
| Bhutan     | 11.61(4.25-25.29)        | 4.43(1.62-9.64)    | 12.57(5.47-23.30)        | 6.71(2.92-12.45)   | 1.61(1.34-1.87)     |
| Bolivia    | 322.78(184.71-529.55)    | 12.02(6.88-19.72)  | 348.60(217.06-527.51)    | 10.00(6.23-15.13)  | -0.59(-0.71, -0.47) |

|                          |                          |                    |                          |                    |                     |
|--------------------------|--------------------------|--------------------|--------------------------|--------------------|---------------------|
| Bosnia and Herzegovina   | 39.22(22.99-65.63)       | 3.58(2.10-5.99)    | 18.82(11.62-28.44)       | 3.84(2.37-5.80)    | 1.27(0.83-1.70)     |
| Botswana                 | 16.11(9.52-27.08)        | 2.73(1.61-4.59)    | 44.54(22.65-89.87)       | 6.38(3.24-12.87)   | 3.49(3.07-3.90)     |
| Brazil                   | 8456.74(7249.76-9689.89) | 16.28(13.96-18.65) | 7273.83(5549.49-9006.18) | 15.10(11.52-18.69) | 0.21(-0.29-0.72)    |
| Brunei                   | 12.71(7.98-20.72)        | 14.04(8.81-22.88)  | 10.86(7.18-16.02)        | 11.48(7.59-16.94)  | -0.16(-0.49-0.16)   |
| Bulgaria                 | 110.18(60.73-179.70)     | 6.35(3.50-10.35)   | 53.26(27.86-91.81)       | 5.46(2.85-9.41)    | -1.05(-1.80, -0.30) |
| Burkina Faso             | 47.81(19.88-93.43)       | 1.01(0.42-1.98)    | 20.46(8.20-52.10)        | 0.20(0.08-0.50)    | -5.88(-6.57, -5.19) |
| Burundi                  | 246.03(141.06-445.16)    | 9.39(5.38-16.98)   | 306.94(95.53-755.90)     | 5.24(1.63-12.91)   | -0.74(-1.26, -0.23) |
| Cambodia                 | 114.41(56.71-189.12)     | 2.45(1.22-4.06)    | 138.92(79.41-235.18)     | 2.72(1.55-4.60)    | 0.37(0.15-0.60)     |
| Cameroon                 | 98.20(43.68-179.74)      | 2.01(0.89-3.68)    | 46.57(23.01-132.13)      | 0.35(0.17-0.98)    | -6.18(-6.79, -5.56) |
| Canada                   | 1077.96(869.06-1333.82)  | 18.74(15.11-23.19) | 750.85(518.87-1154.17)   | 12.17(8.41-18.70)  | -1.23(-1.50, -0.95) |
| Cape Verde               | 0.01(0.00-0.04)          | 0.01(0.00-0.02)    | 0.02(0.01-0.07)          | 0.02(0.01-0.05)    | 3.36(3.09-3.63)     |
| Central African Republic | 24.00(9.62-48.28)        | 1.96(0.79-3.95)    | 36.02(16.88-69.40)       | 1.58(0.74-3.04)    | -0.46(-0.65, -0.28) |
| Chad                     | 23.67(10.66-44.79)       | 0.81(0.36-1.53)    | 15.02(5.94-43.91)        | 0.17(0.07-0.49)    | -5.83(-6.51, -5.15) |

|                                  |                             |                   |                             |                   |                     |
|----------------------------------|-----------------------------|-------------------|-----------------------------|-------------------|---------------------|
| Chile                            | 145.79(117.61-180.47)       | 3.67(2.96-4.54)   | 273.39(203.48-366.81)       | 7.49(5.57-10.04)  | 2.49(1.35-3.65)     |
| China                            | 16801.33(12134.28-22440.18) | 5.28(3.81-7.05)   | 14240.14(10185.93-18731.63) | 5.48(3.92-7.21)   | 1.06(0.61-1.51)     |
| Colombia                         | 1102.44(839.65-1399.30)     | 9.45(7.20-12.00)  | 1029.70(694.15-1444.61)     | 9.70(6.54-13.61)  | 0.71(-0.00-1.43)    |
| Comoros                          | 25.10(12.38-45.03)          | 11.80(5.82-21.17) | 38.59(18.35-71.72)          | 16.07(7.64-29.86) | 0.86(0.59-1.12)     |
| Congo                            | 41.49(17.52-79.45)          | 3.94(1.66-7.55)   | 62.08(34.39-105.57)         | 3.22(1.78-5.47)   | -0.47(-0.68, -0.25) |
| Cook Islands                     | 0.01(0.00-0.03)             | 0.22(0.07-0.52)   | 0.02(0.00-0.06)             | 0.52(0.09-1.56)   | 0.10(-0.86-1.06)    |
| Costa Rica                       | 138.19(103.99-179.53)       | 12.29(9.25-15.97) | 71.96(51.29-100.79)         | 7.07(5.04-9.91)   | -1.43(-1.66, -1.19) |
| Cote d'Ivoire                    | 179.13(40.29-338.61)        | 3.14(0.71-5.94)   | 387.64(97.21-822.63)        | 3.35(0.84-7.11)   | 0.05(-0.32-0.42)    |
| Croatia                          | 120.61(93.24-152.20)        | 12.22(9.45-15.42) | 77.45(52.88-108.42)         | 12.97(8.86-18.16) | 0.17(-0.13-0.46)    |
| Cuba                             | 330.24(246.85-443.49)       | 13.19(9.86-17.71) | 204.09(144.29-281.69)       | 11.49(8.12-15.85) | 0.74(0.19-1.30)     |
| Cyprus                           | 21.68(13.87-34.88)          | 10.95(7.01-17.62) | 22.74(14.73-35.69)          | 10.40(6.74-16.32) | 0.86(0.35-1.37)     |
| Czech Republic                   | 202.88(155.80-272.18)       | 9.21(7.07-12.35)  | 124.62(79.34-190.26)        | 7.26(4.62-11.09)  | -1.08(-1.51, -0.64) |
| Democratic Republic of the Congo | 407.55(162.37-792.59)       | 2.30(0.92-4.48)   | 458.75(263.79-757.89)       | 1.21(0.69-1.99)   | -1.57(-2.16, -0.98) |



|                                |                         |                   |                           |                    |                     |
|--------------------------------|-------------------------|-------------------|---------------------------|--------------------|---------------------|
| Denmark                        | 60.57(44.03-80.06)      | 6.86(4.98-9.06)   | 129.07(87.29-188.38)      | 13.53(9.15-19.74)  | 1.33(0.83-1.82)     |
| Djibouti                       | 29.01(13.07-50.84)      | 16.66(7.51-29.20) | 61.30(25.38-116.07)       | 14.84(6.14-28.09)  | -0.00(-0.32-0.31)   |
| Dominica                       | 2.06(1.21-3.28)         | 8.30(4.87-13.20)  | 3.39(1.63-6.35)           | 24.74(11.88-46.40) | 3.51(3.11-3.91)     |
| Dominican Republic             | 191.02(111.46-433.99)   | 7.09(4.14-16.10)  | 522.99(317.22-818.24)     | 17.80(10.80-27.85) | 1.63(0.82-2.45)     |
| Ecuador                        | 225.10(166.16-303.85)   | 5.82(4.30-7.86)   | 329.56(224.06-494.89)     | 6.50(4.42-9.76)    | 0.86(0.26-1.46)     |
| Egypt                          | 844.42(363.66-1962.02)  | 3.81(1.64-8.85)   | 1168.24(698.77-2319.64)   | 3.17(1.90-6.29)    | -0.09(-0.81-0.64)   |
| El Salvador                    | 100.02(67.19-142.42)    | 4.63(3.11-6.60)   | 60.00(40.42-85.97)        | 3.30(2.22-4.73)    | -1.28(-1.49, -1.06) |
| Equatorial Guinea              | 4.26(1.83-8.53)         | 2.16(0.93-4.33)   | 23.99(10.99-45.55)        | 4.10(1.88-7.79)    | 2.12(1.73-2.51)     |
| Eritrea                        | 124.17(69.15-205.75)    | 7.80(4.34-12.92)  | 327.92(145.59-629.50)     | 12.99(5.77-24.93)  | 1.54(1.24-1.85)     |
| Estonia                        | 37.62(25.24-57.69)      | 10.78(7.23-16.53) | 12.00(7.27-20.03)         | 5.55(3.36-9.27)    | -1.48(-1.79, -1.17) |
| Ethiopia                       | 1596.84(647.29-5312.57) | 6.55(2.66-21.81)  | 3801.53(1602.09-10697.57) | 8.57(3.61-24.12)   | 0.93(0.34-1.52)     |
| Federated States of Micronesia | 0.10(0.04-0.21)         | 0.22(0.08-0.46)   | 0.06(0.02-0.13)           | 0.19(0.07-0.41)    | -0.65(-0.83, -0.47) |
| Fiji                           | 3.99(1.56-9.33)         | 1.42(0.55-3.31)   | 4.02(1.41-9.86)           | 1.48(0.52-3.62)    | -1.91(-3.18, -0.62) |

|           |                                |                    |                                |                    |                     |
|-----------|--------------------------------|--------------------|--------------------------------|--------------------|---------------------|
| Finland   | 48.55(38.22-61.43)             | 5.03(3.96-6.37)    | 142.45(103.15-196.67)          | 16.82(12.18-23.22) | 3.56(2.74-4.38)     |
| France    | 1799.50(1543.28-2045.04)       | 15.36(13.17-17.46) | 1210.84(891.28-1671.68)        | 10.43(7.68-14.40)  | -1.22(-1.44, -1.00) |
| Gabon     | 14.52(7.68-28.61)              | 3.56(1.88-7.02)    | 27.14(15.38-44.79)             | 4.25(2.41-7.01)    | 0.93(0.71-1.16)     |
| Georgia   | 4.31(2.50-7.48)                | 0.32(0.18-0.55)    | 26.39(15.35-41.78)             | 3.59(2.09-5.68)    | 12.60(11.05-14.18)  |
| Germany   | 1686.57(1340.54-2120.20)       | 13.03(10.35-16.38) | 1759.63(1292.19-2378.82)       | 14.71(10.80-19.88) | 0.20(-0.12-0.53)    |
| Ghana     | 6.64(3.54-12.45)               | 0.10(0.05-0.19)    | 5.91(1.98-18.71)               | 0.05(0.02-0.15)    | -3.99(-5.19, -2.78) |
| Global    | 145057.36(120924.76-173294.30) | 8.34(6.95-9.96)    | 174186.30(127104.64-223265.92) | 8.66(6.32-11.10)   | 0.45(0.32-0.57)     |
| Greece    | 125.12(108.61-142.79)          | 6.18(5.37-7.06)    | 76.12(59.81-94.53)             | 5.46(4.29-6.78)    | 0.28(-0.06-0.61)    |
| Greenland | 1.98(1.27-2.91)                | 13.95(8.94-20.45)  | 0.26(0.13-0.66)                | 2.23(1.10-5.60)    | -5.84(-6.20, -5.49) |
| Grenada   | 2.38(1.55-3.75)                | 7.13(4.64-11.23)   | 2.12(1.37-3.26)                | 9.71(6.28-14.91)   | 1.65(1.21-2.08)     |
| Guam      | 0.07(0.04-0.11)                | 0.17(0.10-0.27)    | 0.08(0.04-0.13)                | 0.22(0.12-0.36)    | 2.88(1.52-4.26)     |
| Guatemala | 165.21(101.38-274.97)          | 4.07(2.50-6.77)    | 132.74(91.32-188.30)           | 2.69(1.85-3.82)    | -1.48(-1.74, -1.21) |
| Guinea    | 259.35(67.55-456.35)           | 9.42(2.45-16.58)   | 466.02(112.09-1012.22)         | 7.71(1.85-16.74)   | -0.40(-0.63, -0.16) |

|               |                             |                    |                             |                    |                     |
|---------------|-----------------------------|--------------------|-----------------------------|--------------------|---------------------|
| Guinea-Bissau | 7.60(3.71-13.27)            | 1.58(0.77-2.75)    | 1.68(0.70-4.19)             | 0.19(0.08-0.47)    | -7.39(-7.79, -6.98) |
| Guyana        | 2.79(1.86-4.01)             | 0.95(0.63-1.37)    | 34.73(21.78-53.75)          | 16.28(10.21-25.19) | 7.96(5.52-10.46)    |
| Haiti         | 342.94(102.58-699.30)       | 12.64(3.78-25.78)  | 690.06(284.45-1294.38)      | 15.85(6.53-29.74)  | 1.28(1.11-1.45)     |
| Honduras      | 134.03(83.85-207.90)        | 6.07(3.80-9.41)    | 166.85(96.01-275.97)        | 5.09(2.93-8.42)    | -0.67(-0.84, -0.49) |
| Hungary       | 218.68(172.98-269.93)       | 10.26(8.12-12.67)  | 115.24(78.34-164.81)        | 8.30(5.64-11.87)   | -0.59(-1.26-0.09)   |
| Iceland       | 7.44(5.77-9.39)             | 11.73(9.10-14.81)  | 8.36(5.27-13.40)            | 12.38(7.80-19.85)  | 1.18(0.49-1.88)     |
| India         | 20271.84(12412.82-28015.45) | 6.21(3.80-8.58)    | 23408.65(15694.05-32008.67) | 6.39(4.28-8.74)    | 0.05(-0.30-0.40)    |
| Indonesia     | 2482.59(1383.45-4328.24)    | 3.67(2.04-6.39)    | 3395.93(2318.89-5191.10)    | 5.05(3.45-7.71)    | 0.91(0.78-1.04)     |
| Iran          | 145.51(81.12-260.14)        | 0.57(0.32-1.02)    | 229.03(96.63-366.36)        | 1.13(0.48-1.82)    | 4.84(3.89-5.80)     |
| Iraq          | 370.22(227.11-583.87)       | 4.49(2.76-7.09)    | 929.92(567.68-1513.15)      | 6.91(4.22-11.24)   | 1.88(1.64-2.11)     |
| Ireland       | 150.15(123.32-186.54)       | 15.28(12.55-18.99) | 79.30(55.33-110.95)         | 7.95(5.55-11.13)   | -1.34(-1.67, -1.01) |
| Israel        | 287.85(209.33-373.24)       | 18.78(13.65-24.35) | 288.39(203.18-395.39)       | 10.97(7.73-15.05)  | -1.49(-1.86, -1.12) |
| Italy         | 2470.92(2232.78-2704.29)    | 26.77(24.19-29.30) | 1615.79(1220.64-2040.69)    | 21.26(16.06-26.85) | -0.78(-1.07, -0.50) |

|            |                          |                    |                          |                    |                     |
|------------|--------------------------|--------------------|--------------------------|--------------------|---------------------|
| Jamaica    | 116.18(87.77-155.62)     | 13.91(10.51-18.63) | 141.09(85.52-220.67)     | 24.16(14.65-37.79) | 1.95(1.17-2.75)     |
| Japan      | 4587.29(4370.00-4795.51) | 19.87(18.93-20.77) | 2642.30(2334.09-2945.57) | 17.11(15.11-19.07) | -0.74(-1.11, -0.37) |
| Jordan     | 150.30(98.17-231.58)     | 9.20(6.01-14.18)   | 374.53(243.79-573.38)    | 10.31(6.71-15.78)  | 0.48(0.21-0.74)     |
| Kazakhstan | 37.91(22.80-58.97)       | 0.73(0.44-1.13)    | 56.23(32.76-90.05)       | 1.04(0.60-1.66)    | 1.83(1.57-2.09)     |
| Kenya      | 425.65(254.89-760.18)    | 3.81(2.28-6.81)    | 864.11(474.15-1395.47)   | 4.63(2.54-7.48)    | 1.17(0.88-1.46)     |
| Kiribati   | 0.03(0.02-0.06)          | 0.12(0.06-0.22)    | 0.06(0.02-0.13)          | 0.15(0.06-0.30)    | 0.42(0.21-0.63)     |
| Kuwait     | 43.59(31.80-59.29)       | 7.86(5.74-10.70)   | 72.34(47.26-104.86)      | 8.56(5.59-12.40)   | 3.98(1.85-6.15)     |
| Kyrgyzstan | 112.87(63.00-190.61)     | 6.73(3.76-11.36)   | 28.10(18.86-41.06)       | 1.24(0.83-1.81)    | 1.79(-1.30-4.98)    |
| Laos       | 39.17(14.59-78.86)       | 2.13(0.79-4.28)    | 71.47(39.69-122.15)      | 3.11(1.73-5.32)    | 1.51(1.37-1.65)     |
| Latvia     | 50.46(33.49-79.65)       | 8.87(5.89-14.00)   | 7.22(4.09-12.09)         | 2.43(1.38-4.07)    | -2.15(-2.94, -1.35) |
| Lebanon    | 58.01(36.11-88.24)       | 5.55(3.45-8.44)    | 78.08(38.81-137.83)      | 6.11(3.04-10.78)   | 0.89(0.64-1.14)     |
| Lesotho    | 11.51(6.69-19.73)        | 1.69(0.98-2.89)    | 15.80(8.89-26.86)        | 2.51(1.41-4.26)    | 1.74(1.29-2.19)     |
| Liberia    | 19.99(10.18-33.44)       | 1.77(0.90-2.96)    | 3.36(1.28-8.13)          | 0.15(0.06-0.37)    | -8.00(-9.00, -6.99) |

|                  |                          |                    |                          |                    |                     |
|------------------|--------------------------|--------------------|--------------------------|--------------------|---------------------|
| Libya            | 188.81(107.11-341.78)    | 10.43(5.91-18.87)  | 239.39(129.03-407.90)    | 16.05(8.65-27.35)  | 1.81(1.36-2.27)     |
| Lithuania        | 61.08(39.49-91.97)       | 7.35(4.75-11.07)   | 19.60(12.33-28.54)       | 4.81(3.02-7.00)    | -0.65(-1.09, -0.20) |
| Luxembourg       | 11.25(9.38-13.32)        | 17.03(14.20-20.17) | 8.21(6.16-10.68)         | 8.11(6.09-10.55)   | -3.11(-3.50, -2.71) |
| Macedonia        | 46.67(32.47-66.68)       | 8.86(6.16-12.66)   | 14.68(8.55-23.04)        | 4.48(2.61-7.03)    | -0.85(-1.31, -0.38) |
| Madagascar       | 674.82(418.50-1054.29)   | 12.37(7.67-19.32)  | 1096.10(523.87-1949.11)  | 9.34(4.46-16.61)   | -0.60(-0.97, -0.23) |
| Malawi           | 2024.39(1310.35-3042.82) | 44.50(28.80-66.88) | 3033.67(1140.63-6370.25) | 37.34(14.04-78.41) | -0.28(-0.51, -0.05) |
| Malaysia         | 414.19(231.64-628.32)    | 6.30(3.52-9.56)    | 573.60(379.75-805.11)    | 7.53(4.99-10.57)   | 0.80(0.33-1.28)     |
| Maldives         | 15.56(6.39-38.36)        | 14.81(6.08-36.52)  | 22.41(14.25-34.09)       | 22.37(14.23-34.03) | 2.04(1.67-2.42)     |
| Mali             | 154.71(32.19-290.55)     | 3.75(0.78-7.04)    | 356.86(79.75-809.20)     | 3.08(0.69-6.99)    | -0.67(-0.88, -0.46) |
| Malta            | 26.42(19.18-35.52)       | 30.18(21.92-40.59) | 20.63(13.08-30.71)       | 32.23(20.43-47.98) | 0.17(-0.26-0.61)    |
| Marshall Islands | 0.03(0.01-0.07)          | 0.13(0.05-0.30)    | 0.04(0.02-0.08)          | 0.22(0.09-0.46)    | 1.51(1.10-1.92)     |
| Mauritania       | 16.49(7.84-30.32)        | 1.78(0.85-3.28)    | 5.54(2.28-16.46)         | 0.30(0.12-0.89)    | -7.00(-7.57, -6.42) |
| Mauritius        | 9.88(8.15-11.97)         | 2.99(2.47-3.63)    | 13.37(10.06-16.59)       | 6.44(4.85-8.00)    | 2.50(1.53-3.48)     |

|             |                          |                    |                          |                   |                     |
|-------------|--------------------------|--------------------|--------------------------|-------------------|---------------------|
| Mexico      | 3646.87(3277.16-4115.37) | 10.91(9.81-12.32)  | 2518.89(1926.22-3369.57) | 7.86(6.01-10.51)  | -0.96(-1.69, -0.23) |
| Moldova     | 49.60(35.90-74.66)       | 4.01(2.90-6.04)    | 23.71(16.50-32.14)       | 4.54(3.16-6.15)   | 1.63(1.16-2.09)     |
| Mongolia    | 18.05(8.14-36.02)        | 2.01(0.90-4.00)    | 22.01(12.35-37.78)       | 2.03(1.14-3.48)   | 0.79(0.32-1.27)     |
| Montenegro  | 13.82(8.90-21.01)        | 8.55(5.51-13.00)   | 4.11(2.55-6.64)          | 3.69(2.29-5.96)   | -1.44(-1.85, -1.04) |
| Morocco     | 1202.52(733.85-1800.77)  | 12.29(7.50-18.40)  | 1202.02(671.94-2113.39)  | 12.28(6.86-21.58) | 0.53(0.28-0.79)     |
| Mozambique  | 712.60(401.93-1346.28)   | 11.49(6.48-21.70)  | 1437.33(528.86-3272.23)  | 10.08(3.71-22.94) | -0.22(-0.50-0.06)   |
| Myanmar     | 478.74(193.88-907.49)    | 3.24(1.31-6.14)    | 753.67(458.39-1186.97)   | 4.83(2.94-7.60)   | 1.48(1.39-1.57)     |
| Namibia     | 44.66(21.60-69.71)       | 7.43(3.60-11.60)   | 116.64(59.55-192.92)     | 14.13(7.21-23.37) | 2.67(2.29-3.04)     |
| Nepal       | 367.64(208.90-664.48)    | 4.36(2.48-7.89)    | 381.67(179.11-671.83)    | 4.14(1.94-7.28)   | 0.01(-0.13-0.15)    |
| Netherlands | 614.04(501.95-763.06)    | 22.53(18.42-28.00) | 327.96(230.46-452.73)    | 12.23(8.59-16.88) | -2.48(-2.84, -2.11) |
| New Zealand | 123.47(99.35-155.57)     | 15.43(12.42-19.44) | 81.79(63.68-104.38)      | 8.33(6.49-10.63)  | -1.18(-1.84, -0.51) |
| Nicaragua   | 318.51(206.27-482.76)    | 17.49(11.33-26.51) | 157.94(101.94-239.39)    | 7.98(5.15-12.09)  | -2.10(-2.41, -1.78) |
| Niger       | 42.20(18.65-88.39)       | 1.04(0.46-2.18)    | 11.50(3.92-28.53)        | 0.09(0.03-0.22)   | -8.78(-9.52, -8.03) |

|                          |                           |                   |                             |                    |                     |
|--------------------------|---------------------------|-------------------|-----------------------------|--------------------|---------------------|
| Nigeria                  | 5711.81(1565.30-9053.34)  | 14.60(4.00-23.14) | 21873.52(5035.87-38816.44)  | 21.53(4.96-38.21)  | 1.68(1.29-2.06)     |
| North Korea              | 324.25(191.78-529.36)     | 5.45(3.22-8.90)   | 133.50(59.83-265.44)        | 2.80(1.25-5.56)    | -1.73(-2.00, -1.45) |
| Northern Mariana Islands | 0.00(0.00-0.01)           | 0.02(0.01-0.06)   | 0.00(0.00-0.01)             | 0.04(0.01-0.08)    | 3.05(1.95-4.17)     |
| Norway                   | 83.27(76.10-90.02)        | 10.43(9.53-11.28) | 40.80(33.30-50.22)          | 4.42(3.60-5.44)    | -3.47(-3.92, -3.02) |
| Oman                     | 36.89(10.39-75.93)        | 4.39(1.24-9.03)   | 53.09(32.04-77.11)          | 4.34(2.62-6.30)    | 0.54(-0.12-1.21)    |
| Pakistan                 | 7467.57(4692.13-11816.85) | 15.17(9.53-24.00) | 23878.68(14590.73-37924.28) | 27.95(17.08-44.39) | 2.97(2.57-3.37)     |
| Palestine                | 65.42(36.77-120.25)       | 6.76(3.80-12.42)  | 171.50(104.64-259.25)       | 9.18(5.60-13.88)   | 2.21(1.65-2.78)     |
| Panama                   | 102.24(79.25-129.44)      | 12.26(9.50-15.52) | 124.85(93.43-167.15)        | 10.82(8.10-14.49)  | -0.76(-1.01, -0.52) |
| Papua New Guinea         | 2.19(0.73-4.42)           | 0.13(0.04-0.26)   | 6.44(2.94-12.49)            | 0.16(0.08-0.32)    | 0.59(0.31-0.87)     |
| Paraguay                 | 156.88(94.65-239.99)      | 9.40(5.67-14.37)  | 223.44(131.82-370.35)       | 11.13(6.57-18.45)  | 0.96(0.67-1.26)     |
| Peru                     | 991.44(628.83-1399.46)    | 11.94(7.58-16.86) | 507.17(321.06-777.12)       | 5.32(3.37-8.15)    | -2.08(-2.27, -1.89) |
| Philippines              | 1809.61(1219.44-2654.50)  | 7.18(4.84-10.53)  | 2555.11(1859.36-3274.08)    | 7.52(5.47-9.63)    | 0.66(0.47-0.85)     |
| Poland                   | 779.33(710.23-854.25)     | 8.14(7.42-8.92)   | 362.38(293.16-440.86)       | 6.16(4.98-7.49)    | -0.79(-1.80-0.24)   |

|                        |                          |                    |                         |                   |                     |
|------------------------|--------------------------|--------------------|-------------------------|-------------------|---------------------|
| Portugal               | 577.19(467.91-695.09)    | 27.28(22.11-32.85) | 175.23(128.07-246.60)   | 12.86(9.40-18.10) | -2.84(-3.10, -2.58) |
| Principality of Monaco | 0.01(0.01-0.01)          | 0.24(0.14-0.40)    | 0.02(0.01-0.03)         | 0.34(0.18-0.60)   | -0.96(-1.80, -0.11) |
| Puerto Rico            | 78.65(59.37-105.20)      | 7.90(5.96-10.56)   | 25.19(18.06-35.75)      | 5.67(4.06-8.04)   | -0.17(-0.77-0.43)   |
| Qatar                  | 1.23(0.79-2.03)          | 0.98(0.63-1.63)    | 6.91(3.63-11.68)        | 1.40(0.74-2.37)   | 2.92(2.02-3.83)     |
| Republic of Nauru      | 0.02(0.01-0.04)          | 0.37(0.15-0.89)    | 0.02(0.01-0.04)         | 0.43(0.17-0.89)   | 0.24(0.09-0.38)     |
| Republic of Niue       | 0.00(0.00-0.01)          | 0.45(0.20-0.88)    | 0.01(0.00-0.02)         | 2.24(1.09-4.02)   | 2.19(1.09-3.29)     |
| Republic of Palau      | 0.00(0.00-0.00)          | 0.01(0.00-0.02)    | 0.00(0.00-0.00)         | 0.01(0.00-0.01)   | -1.09(-1.34, -0.85) |
| Republic of San Marino | 0.19(0.12-0.30)          | 4.76(3.04-7.28)    | 0.10(0.04-0.18)         | 2.18(1.02-4.21)   | -2.33(-2.60, -2.05) |
| Romania                | 784.13(451.62-1337.99)   | 14.08(8.11-24.03)  | 244.37(146.65-396.14)   | 8.12(4.87-13.16)  | -1.65(-2.04, -1.26) |
| Russian Federation     | 2977.05(2318.08-3885.58) | 8.58(6.68-11.20)   | 1163.15(913.40-1361.62) | 4.46(3.50-5.22)   | -2.39(-2.65, -2.14) |
| Rwanda                 | 467.28(276.27-767.35)    | 13.77(8.14-22.62)  | 581.63(249.87-1069.33)  | 11.70(5.03-21.51) | -0.20(-0.51-0.10)   |
| Saint Kitts and Nevis  | 1.06(0.69-1.66)          | 7.54(4.88-11.77)   | 1.63(0.95-2.63)         | 16.52(9.62-26.72) | 2.54(2.28-2.81)     |
| Saint Lucia            | 4.83(3.29-7.08)          | 9.37(6.38-13.73)   | 3.86(2.30-6.15)         | 13.01(7.74-20.73) | 1.26(1.00-1.52)     |



|                                  |                       |                    |                      |                   |                     |
|----------------------------------|-----------------------|--------------------|----------------------|-------------------|---------------------|
| Saint Vincent and the Grenadines | 0.23(0.17-0.31)       | 0.56(0.41-0.75)    | 3.09(2.12-4.53)      | 12.38(8.49-18.15) | 6.88(3.08-10.82)    |
| Samoa                            | 2.56(1.21-4.90)       | 3.59(1.69-6.88)    | 3.35(1.10-7.39)      | 4.19(1.37-9.24)   | 0.50(0.36-0.64)     |
| Sao Tome and Principe            | 1.16(0.55-2.16)       | 2.04(0.96-3.81)    | 0.18(0.05-0.43)      | 0.23(0.06-0.56)   | -7.37(-8.41, -6.31) |
| Saudi Arabia                     | 445.06(83.08-785.05)  | 6.79(1.27-11.98)   | 220.63(90.59-421.75) | 2.92(1.20-5.57)   | -2.31(-3.60, -1.01) |
| Senegal                          | 68.05(29.31-124.31)   | 1.86(0.80-3.40)    | 15.53(4.91-35.25)    | 0.24(0.08-0.55)   | -7.22(-7.84, -6.59) |
| Serbia                           | 415.27(232.43-680.07) | 19.15(10.72-31.36) | 84.52(45.70-155.88)  | 6.37(3.44-11.74)  | -4.12(-4.62, -3.63) |
| Seychelles                       | 0.00(0.00-0.00)       | 0.00(0.00-0.00)    | 0.00(0.00-0.00)      | 0.00(0.00-0.00)   | 1.40(1.00-1.80)     |
| Sierra Leone                     | 33.06(15.26-58.20)    | 1.82(0.84-3.21)    | 8.40(3.88-21.92)     | 0.23(0.11-0.61)   | -7.21(-8.03, -6.38) |
| Singapore                        | 124.41(100.82-149.74) | 19.16(15.53-23.06) | 108.82(78.80-147.81) | 13.40(9.70-18.20) | -0.91(-1.36, -0.46) |
| Slovakia                         | 95.14(59.10-148.00)   | 7.18(4.46-11.16)   | 68.31(37.22-123.31)  | 7.98(4.35-14.40)  | 0.63(0.33-0.94)     |
| Slovenia                         | 26.71(21.13-33.58)    | 6.46(5.11-8.12)    | 8.52(5.62-12.62)     | 2.73(1.80-4.04)   | -2.36(-3.04, -1.67) |
| Solomon Islands                  | 0.14(0.04-0.35)       | 0.09(0.03-0.22)    | 0.32(0.09-0.73)      | 0.12(0.04-0.28)   | 0.79(0.31-1.28)     |
| Somalia                          | 133.72(62.39-333.74)  | 3.43(1.60-8.57)    | 192.62(65.02-571.72) | 1.86(0.63-5.53)   | -1.41(-1.74, -1.07) |

|                            |                          |                    |                        |                    |                     |
|----------------------------|--------------------------|--------------------|------------------------|--------------------|---------------------|
| South Africa               | 732.02(474.03-1060.42)   | 5.38(3.48-7.79)    | 851.59(622.99-1228.82) | 5.60(4.10-8.08)    | 0.56(0.11-1.01)     |
| South Korea                | 1914.57(1247.89-2806.53) | 16.84(10.97-24.68) | 557.80(350.32-824.82)  | 9.18(5.77-13.58)   | -2.63(-3.07, -2.19) |
| South Sudan                | 246.52(110.59-506.43)    | 9.39(4.21-19.30)   | 373.23(192.57-679.21)  | 8.69(4.48-15.81)   | 0.39(-0.03-0.80)    |
| Spain                      | 1496.65(1298.21-1717.25) | 19.10(16.57-21.91) | 922.14(719.40-1174.01) | 14.23(11.10-18.12) | -0.83(-1.03, -0.63) |
| Sri Lanka                  | 332.49(227.48-484.12)    | 6.01(4.11-8.75)    | 286.71(169.01-471.02)  | 5.62(3.31-9.23)    | 0.05(-0.51-0.61)    |
| Sudan                      | 51.43(9.91-232.54)       | 0.58(0.11-2.62)    | 179.94(73.46-584.51)   | 1.08(0.44-3.52)    | 3.09(2.68-3.51)     |
| Suriname                   | 6.98(4.24-10.78)         | 5.36(3.26-8.28)    | 11.07(6.48-17.24)      | 7.73(4.52-12.03)   | 1.67(1.33-2.01)     |
| Swaziland                  | 12.73(7.39-21.99)        | 3.30(1.92-5.70)    | 18.31(10.62-33.08)     | 4.44(2.57-8.02)    | 1.18(0.70-1.66)     |
| Sweden                     | 260.44(206.03-328.17)    | 16.86(13.34-21.25) | 192.55(134.73-270.59)  | 10.58(7.40-14.86)  | -1.93(-2.50, -1.35) |
| Switzerland                | 152.38(124.52-184.44)    | 13.19(10.77-15.96) | 257.72(184.50-358.58)  | 19.34(13.85-26.91) | 0.41(-0.12-0.93)    |
| Syria                      | 96.38(50.94-186.21)      | 1.63(0.86-3.14)    | 54.52(31.36-82.83)     | 1.49(0.86-2.26)    | 0.39(-0.11-0.89)    |
| Taiwan (Province of China) | 249.95(214.89-288.00)    | 4.54(3.90-5.23)    | 160.33(126.03-211.15)  | 5.44(4.28-7.17)    | 0.22(-0.29-0.73)    |
| Tajikistan                 | 1.97(1.07-3.39)          | 0.08(0.05-0.15)    | 2.95(1.70-4.80)        | 0.08(0.05-0.13)    | 0.08(-0.50-0.66)    |

|                     |                          |                    |                          |                    |                     |
|---------------------|--------------------------|--------------------|--------------------------|--------------------|---------------------|
| Tanzania            | 1735.22(1065.78-2898.27) | 14.37(8.83-24.00)  | 4303.00(1980.35-7660.11) | 17.63(8.12-31.39)  | 1.29(0.98-1.59)     |
| Thailand            | 1199.79(795.59-1683.64)  | 7.12(4.72-9.99)    | 772.61(553.49-1062.91)   | 7.91(5.67-10.88)   | -0.16(-0.49-0.17)   |
| The Bahamas         | 10.48(7.17-14.90)        | 12.99(8.89-18.47)  | 10.44(6.82-16.37)        | 12.86(8.40-20.16)  | 0.01(-0.33-0.36)    |
| The Gambia          | 26.20(6.95-48.66)        | 5.68(1.51-10.55)   | 52.35(16.07-111.95)      | 5.27(1.62-11.27)   | -0.64(-0.98, -0.30) |
| Timor-Leste         | 7.87(3.22-17.19)         | 2.37(0.97-5.17)    | 12.73(7.44-20.83)        | 2.45(1.43-4.00)    | -0.28(-0.61-0.05)   |
| Togo                | 27.67(11.97-53.81)       | 1.57(0.68-3.05)    | 6.97(2.86-18.13)         | 0.21(0.09-0.55)    | -7.41(-8.14, -6.68) |
| Tokelau             | 0.00(0.00-0.00)          | 0.23(0.08-0.52)    | 0.01(0.00-0.03)          | 3.01(0.77-8.02)    | 2.79(0.55-5.08)     |
| Tonga               | 0.06(0.02-0.13)          | 0.15(0.06-0.31)    | 0.08(0.03-0.18)          | 0.21(0.08-0.46)    | 0.66(0.25-1.06)     |
| Trinidad and Tobago | 111.64(87.82-140.35)     | 27.48(21.61-34.54) | 91.33(63.93-126.26)      | 33.53(23.47-46.35) | 1.53(1.14-1.92)     |
| Tunisia             | 486.55(305.97-766.96)    | 15.67(9.85-24.70)  | 332.10(192.59-580.51)    | 12.01(6.96-20.99)  | -0.39(-0.60, -0.18) |
| Turkey              | 3349.25(1941.47-5392.64) | 16.35(9.48-26.32)  | 3417.85(2141.22-5084.91) | 18.45(11.56-27.46) | 0.92(0.58-1.26)     |
| Turkmenistan        | 25.07(13.47-47.69)       | 1.67(0.90-3.18)    | 34.29(20.51-55.98)       | 2.25(1.35-3.67)    | 1.48(1.12-1.83)     |
| Tuvalu              | 0.01(0.00-0.02)          | 0.23(0.09-0.44)    | 0.01(0.00-0.02)          | 0.21(0.09-0.44)    | -0.39(-0.62, -0.16) |

|                      |                             |                    |                          |                    |                     |
|----------------------|-----------------------------|--------------------|--------------------------|--------------------|---------------------|
| Uganda               | 938.18(490.12-1620.15)      | 11.14(5.82-19.24)  | 3230.29(1408.61-6314.28) | 16.29(7.10-31.83)  | 1.55(1.26-1.83)     |
| Ukraine              | 1043.20(699.63-1580.29)     | 9.17(6.15-13.89)   | 555.16(338.58-862.20)    | 8.75(5.34-13.59)   | 0.75(0.23-1.28)     |
| United Arab Emirates | 23.40(12.82-43.14)          | 3.97(2.18-7.32)    | 48.12(30.23-72.00)       | 3.59(2.26-5.38)    | 0.82(0.24-1.41)     |
| United Kingdom       | 3340.12(3189.79-3508.49)    | 30.59(29.21-32.13) | 1530.32(1333.53-1702.63) | 12.99(11.32-14.45) | -2.12(-2.64, -1.59) |
| United States        | 11211.64(10328.74-12068.24) | 20.05(18.47-21.58) | 7174.10(6125.32-8219.63) | 12.07(10.31-13.83) | -1.33(-1.51, -1.14) |
| Uruguay              | 101.97(77.50-137.34)        | 12.46(9.47-16.78)  | 74.12(51.45-105.00)      | 11.24(7.80-15.92)  | -0.48(-0.81, -0.15) |
| Uzbekistan           | 184.24(106.37-320.27)       | 2.15(1.24-3.74)    | 399.60(236.78-627.08)    | 3.96(2.35-6.21)    | 2.78(2.45-3.11)     |
| Vanuatu              | 0.06(0.02-0.14)             | 0.09(0.03-0.21)    | 0.14(0.05-0.32)          | 0.12(0.04-0.27)    | 1.04(0.56-1.52)     |
| Venezuela            | 871.45(726.07-1057.52)      | 12.28(10.24-14.91) | 624.66(436.89-886.73)    | 9.43(6.60-13.39)   | -0.49(-0.89, -0.10) |
| Vietnam              | 1744.23(963.42-2593.44)     | 6.58(3.63-9.78)    | 1667.95(969.49-2642.90)  | 6.74(3.92-10.67)   | 0.06(-0.10-0.21)    |
| Virgin Islands, U.S. | 2.37(1.40-3.59)             | 7.41(4.39-11.22)   | 0.87(0.38-1.82)          | 6.46(2.87-13.62)   | 0.78(0.26-1.29)     |
| Yemen                | 17.02(3.75-84.77)           | 0.24(0.05-1.19)    | 81.32(29.32-275.75)      | 0.59(0.21-2.00)    | 4.17(3.56-4.79)     |
| Zambia               | 677.92(386.08-1139.09)      | 18.06(10.28-30.34) | 1478.10(779.60-2584.82)  | 17.87(9.43-31.25)  | 0.40(0.06-0.74)     |

|          |                      |                 |                       |                  |                 |
|----------|----------------------|-----------------|-----------------------|------------------|-----------------|
| Zimbabwe | 200.71(97.87-327.72) | 4.17(2.03-6.80) | 451.52(249.04-711.05) | 7.17(3.96-11.30) | 2.10(1.64-2.56) |
|----------|----------------------|-----------------|-----------------------|------------------|-----------------|

---

Abbreviations: DALYs, disability adjusted life years; EAPC, estimated annual percentage change; UI, uncertainty interval.

<sup>a</sup> EAPC is expressed as 95% confidence interval.
